# Supplementary material for: Development of a method for the parallel synthesis and purification of N-substituted pantothenamides, known inhibitors of coenzyme A biosynthesis and utilization
Source: Royal Society of Chemistry journal article supplement (doi:10.1039/b811086g), 2008-01-01
Supplement: b811086g.pdf [file b811086g.pdf]

**Supplementary Information for DOI: 10.1039/b811086g**

**Development of a method for the parallel synthesis and purification of *N*-substituted pantothenamides, known inhibitors of Coenzyme A biosynthesis and utilization**

**Marianne van Wyk and Erick Strauss\***

Department of Biochemistry, Stellenbosch University, Private bag X1, Matieland 7602, South Africa

\*E-mail: [estrauss@sun.ac.za](mailto:estrauss@sun.ac.za)

**Synthetic preparation of pantothenic acid thioesters**

The thiopantothenate precursors were prepared synthetically according to a method modified from Yamada *et al.*<sup>1</sup>

**S-Phenyl thio- $\alpha$ -pantothenate (1a)** *$\alpha$ -Pantothenic acid*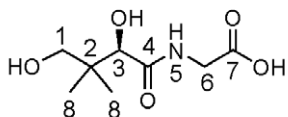

L-glycine (2.20 g; 29.3 mmol) was dissolved in 29.3 ml 1M NaOH, and the solution was lyophilized. Pantolactone (4.20 g; 32.2 mmol) was added to the resulting salt and the mixture was heated under nitrogen for 17 hours at 130°C. The resulting orange, sticky oil was dissolved in water and loaded onto a column of Amberlite IR-120 (H<sup>+</sup>-form) ion exchange resin. The free acid of  $\alpha$ -pantothenic acid was

eluted with deionized water. Unreacted pantolactone present in the eluate was removed by extraction with dichloromethane (5×100 ml). The aqueous layer was lyophilized to give the pure acid as a yellow sticky solid (5.61 g; 93%).  $\delta_{\text{H}}$  (300 MHz; D<sub>2</sub>O; 25°C)  $\delta$  0.79 (3H, s, -CH<sub>3</sub>[8]), 0.82 (3H, s, -CH<sub>3</sub>[8]), 3.28 (1H, d, *J* 11.1, -CH-[1]), 3.39 (1H, d, *J* 11.1, -CH-[1]), 3.75 (1H, d, *J* 17.6, -CH-[6]), 3.83 (1H, d, *J* 17.6, -CH-[6]) and 3.91 (1H, s, -CH-[3]); *m/z* (ESI-MS) [M-H]<sup>-</sup> 204 (Calculated [C<sub>8</sub>H<sub>14</sub>NO<sub>5</sub>]<sup>-</sup> = 204.09).

**S-Phenyl thio- $\alpha$ -pantothenate 1a**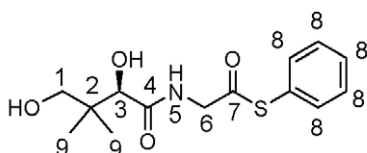

The  $\alpha$ -pantothenic acid prepared above (27.4 mmol) was dissolved in 24 ml DMF followed by the addition of diphenylphosphoryl azide (9.70 ml; 54.7 mmol) and thiophenol (3.37 ml; 32.8 mmol). After cooling to 0°C, triethylamine (7.63 ml; 54.7 mmol) was added and the solution was stirred for 10 minutes at 0°C followed by stirring for 3 hours at room temperature.

Ethyl acetate (250 ml) was added and the solution was washed with 1M HCl (2×50 ml), 1M NaHCO<sub>3</sub> (2×50 ml) and saturated NaCl (1×50 ml). The solution was dried over Na<sub>2</sub>SO<sub>4</sub> and the solvent was removed *in vacuo*. The residue was purified by flash chromatography (silica gel; ethyl acetate/hexane 2:1 to 4:1) to give *S*-phenyl thio- $\alpha$ -pantothenate **1a** as an orange oil (2.06 g; 25%).  $\delta_{\text{H}}$  (300 MHz; CDCl<sub>3</sub>; 25°C)  $\delta$  0.97 (3H, s, -CH<sub>3</sub>[9]), 1.05 (3H, s, -CH<sub>3</sub>[9]), 3.51 (2H, d, *J* 11.2, -CH<sub>2</sub>-[1]), 3.57 (2H, d, *J* 11.2, -CH<sub>2</sub>-[1]), 4.11 (1H, s, -CH-[3]), 4.28 (1H, dd, *J* 17.9, 6.1, -CH-[6]), 4.36 (1H, dd, *J* 17.9, 6.1, -CH-[6]), 7.42 (5H, s, arom.[8]) and 7.43 (1H, br s, -NH-[5]);  $\delta_{\text{C}}$  (75MHz; CDCl<sub>3</sub>; 25°C):  $\delta$  20.5, 21.5, 39.4, 48.5, 71.3, 77.6, 129.4, 129.8, 134.7, 173.6 and 195.3; *m/z* (ESI-MS) [M+H]<sup>+</sup> 298 (Calculated [C<sub>14</sub>H<sub>20</sub>NO<sub>4</sub>S]<sup>+</sup> = 298.11).

**S-Phenyl thiopantothenate (1b)**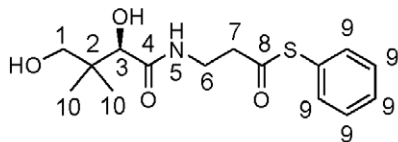

Sodium pantothenate (1.00 g; 4.15 mmol) was exchanged to the free acid by dissolving the salt in water and passing the solution through a column of Amberlite IR-120 (H<sup>+</sup>-form) ion exchange resin. The free acid of pantothenic acid was eluted with deionized water, followed by lyophilization of the collected column eluate. The resulting syrup was dissolved in 5 ml DMF and diphenylphosphoryl azide (1.47 ml; 8.30 mmol) and thiophenol (0.513 ml; 5.00 mmol) were added. After cooling to 0°C triethylamine (1.15 ml; 8.25 mmol) was added. The solution was stirred for 10 minutes at 0°C and then at room temperature for 3 hours. Ethyl acetate (50 ml) was added and the solution was sequentially washed with 1M HCl (2×10 ml), 1M NaHCO<sub>3</sub> (2×10 ml) and saturated NaCl (1×10 ml). The solution was dried over Na<sub>2</sub>SO<sub>4</sub> and the solvent was removed *in vacuo*. The residue was purified by flash chromatography (silica gel; ethyl acetate/hexane 2:1 to 4:1) to give *S*-phenyl thiopantothenate **1b** as a yellow oil (0.550 g; 42%).  $\delta_{\text{H}}$  (400 MHz; CDCl<sub>3</sub>; 25°C)  $\delta$  0.92 (3H, s, -CH<sub>3</sub>[10]), 1.02 (3H, s, -CH<sub>3</sub>[10]), 2.91–2.95 (2H, m, -CH<sub>2</sub>-[7]), 3.47 (1H, d, *J* 11.2, -CH-[1]), 3.52 (1H, d, *J* 11.2, -CH-[1]), 3.56–3.69 (2H, m, -CH<sub>2</sub>-[6]), 4.01 (1H, s, -CH-[3]), 7.10 (1H, br s, -NH-[5]) and 7.38–7.44 (5H, m, arom.[9]);  $\delta_{\text{C}}$  (100 MHz; CDCl<sub>3</sub>; 25°C):  $\delta$  20.3, 21.2, 34.9, 39.2, 42.8, 71.2, 77.5, 127.0, 129.3, 129.7, 134.4, 173.2 and 196.9; *m/z* (ESI-MS) [M+H]<sup>+</sup> 312 (Calculated [C<sub>15</sub>H<sub>22</sub>NO<sub>4</sub>S]<sup>+</sup> = 312.13).

**S-Phenyl thiohomopantothenate (1c)***Homopantothenic acid*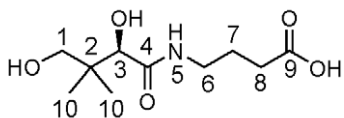

4-Amino butyric acid (0.500 g; 4.80 mmol) was dissolved in 4.80 ml 1M NaOH, followed by lyophilization of the solution. Pantolactone (0.500 g; 3.84 mmol) was added to the resulting white salt and the mixture was heated under nitrogen for 17 hours at 130°C. The resulting colourless sticky oil was dissolved in water and loaded onto a column of Amberlite IR-120 (H<sup>+</sup>-form)

ion exchange resin. The free acid of homopantothenic acid was eluted with deionized water. Unreacted pantolactone present in the eluate was removed by extraction with dichloromethane (3×20 ml). The aqueous layer was lyophilized to give the pure acid as a colourless sticky solid (0.877 g; 99%).  $\delta_{\text{H}}$  (400 MHz; D<sub>2</sub>O; 25°C)  $\delta$  0.76 (3H, s, -CH<sub>3</sub>[10]), 0.79 (3H, s, -CH<sub>3</sub>[10]), 1.66 (2H, tt, *J* 7.4, 6.9, -CH<sub>2</sub>-[7]), 2.19 (2H, t, *J* 7.4, -CH<sub>2</sub>-[8]), 3.29 (2H, t, *J* 6.9, -CH<sub>2</sub>-[6]), 3.25 (1H, d, *J* 11.3, -CH-[1]), 3.37 (1H, d, *J* 11.3 -CH-[1]) and 3.84 (1H, s, -CH-[3]); *m/z* (ESI-MS) [M-H]<sup>-</sup> 232 (Calculated [C<sub>10</sub>H<sub>18</sub>NO<sub>5</sub>]<sup>-</sup> = 232.12).

*S-Phenyl thiohomopantothenate 1c*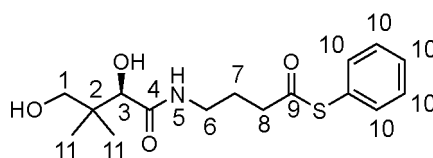

The homopantothenic acid prepared above was dissolved in 3.8 ml DMF followed by the addition of diethyl cyanophosphonate (1.14 ml; 7.60 mmol) and thiophenol (0.493 ml; 4.80 mmol). After cooling to 0°C, triethylamine (1.06 ml; 7.60 mmol) was added and the solution was stirred for 10 minutes at 0°C followed by stirring for 3 hours at room temperature. Ethyl acetate (50 ml) was added and the solution was

washed with 5% citric acid (3×10 ml), 1M NaHCO<sub>3</sub> (3×10 ml) and saturated NaCl (2×10 ml). The solution was dried over Na<sub>2</sub>SO<sub>4</sub> and the solvent was removed *in vacuo*. The residue was purified by flash chromatography (silica gel; ethyl acetate/hexane 2:1 to 4:1) to give *S*-phenyl thiohomopantothenate **1c** as a orange oil (0.761 g; 61%).  $\delta_{\text{H}}$  (300 MHz; CDCl<sub>3</sub>; 25°C)  $\delta$  0.91 (3H, s, -CH<sub>3</sub>[11]), 1.00 (3H, s, -CH<sub>3</sub>[11]), 1.93 (2H, q, *J* 7.0, -CH<sub>2</sub>-[7]), 2.71 (2H, t, *J* 7.1, -CH<sub>2</sub>-[8]), 3.29–3.42 (2H, m, -CH<sub>2</sub>-[6]), 3.47 (1H, d, *J* 11.4 -CH-[1]), 3.51 (1H, d, *J* 11.4 -CH-[1]), 4.01 (1H, s, -CH-[3]), 6.90 (1H, br s, -NH-[5]) and 7.40 (5H, s, arom.[10]);  $\delta_{\text{C}}$  (75 MHz; CDCl<sub>3</sub>; 25°C):  $\delta$  20.2, 21.3, 25.3, 38.1, 39.3, 40.8, 71.3, 77.6, 129.2, 129.5, 134.4, 173.4 and 197.3; *m/z* (ESI-MS) [M+H]<sup>+</sup> 326 (Calculated [C<sub>16</sub>H<sub>24</sub>NO<sub>4</sub>S]<sup>+</sup> = 326.14).

**Synthetic preparation of 5-azidopentan-1-amine**

5-Azidopentan-1-amine was prepared by modification of the method of Lee *et al.*<sup>2</sup>

*5-Azidopentan-1-amine 28m*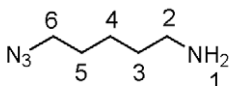

1,5-Dibromopentane (2.30 g; 10.0 mmol) was dissolved in DMF (50 ml) and sodium azide (2.60 g; 40.0 mmol) was carefully added while the solution was heated. The reaction was subsequently stirred for 20 hours at 80 °C. A mixture of ether (50 ml) and water (50 ml) was added to the reaction and mixture was left to separate. The organic

phase was removed and 1,5-diazidopentane was extracted from the aqueous phase with ether (2×25 ml). The combined organic phases were washed thoroughly with water (5×12 ml) and dried over MgSO<sub>4</sub>. After filtration the organic phase was reduced to ~7 ml by evaporation. Ethyl acetate (7 ml) was added to the resulting 1,5-diazidopentane/ether mixture, followed by addition of a 5% HCl solution (10 ml). The reaction was cooled to 0°C, and triphenylphosphine (2.56 g; 9.75 mmol) was added slowly over 2 hours. The reaction was allowed to warm to room temperature and subsequently stirred for a further 18 hours. The organic layer was removed and the aqueous phase was washed with dichloromethane (2×10 ml). The pH of the aqueous phase was adjusted to pH 12 by addition of NaOH, and the product was extracted with dichloromethane (4×25 ml). Evaporation of the solvent gave 5-azidopentan-1-amine **28m** (470 mg; 37%).  $\delta_{\text{H}}$  (300 MHz; CDCl<sub>3</sub>; 25°C)  $\delta$  1.35–1.51 (4H, m, -CH<sub>2</sub>-[4+5]), 1.60 (2H, tt, *J* 6.8, 7.1, -CH<sub>2</sub>-[3]), 1.64 (2H, s, -NH<sub>2</sub>[1]), 2.69 (2H, t, *J* 7.1, -CH<sub>2</sub>-[6]) and 3.26 (2H, t, *J* 6.8, -CH<sub>2</sub>-[2]);  $\delta_{\text{C}}$  (75 MHz; CDCl<sub>3</sub>; 25°C):  $\delta$  24.0, 28.7, 33.1, 41.9 and 51.4; *m/z* (EI-MS) [M+H]<sup>+</sup> 129 (Calculated [C<sub>5</sub>H<sub>13</sub>N<sub>4</sub>]<sup>+</sup> = 129.11).

**Characterization of *N*-substituted pantothenamides 4 and 45**

Pantothenamides **4a-c** and **45a-c** were thoroughly characterized by  $^1\text{H}$  NMR,  $^{13}\text{C}$  NMR, and by LC-MS analysis, the latter giving single peaks with the reported retention times. The small peak visible at 0.6 minutes in all the LC-MS chromatograms is also present in the chromatogram for a blank injection of the solvent used to prepare the samples for LC-MS analysis, as shown below. All other pantothenamides were characterized by  $^1\text{H}$  NMR.

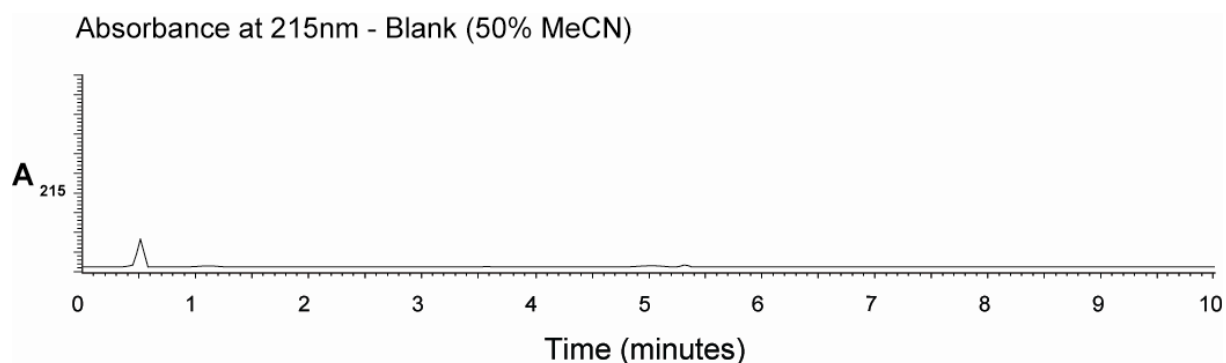***N*-Pentyl  $\alpha$ -pantothenamide (4a)**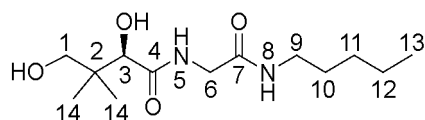

$\delta_{\text{H}}$  (300 MHz;  $\text{CDCl}_3$ ;  $25^\circ\text{C}$ )  $\delta$  0.89 (3H, t,  $J$  6.9,  $-\text{CH}_3$ [13]), 0.97 (3H, s,  $-\text{CH}_3$ [14]), 1.05 (3H, s,  $-\text{CH}_3$ [14]), 1.23–1.35 (4H, m,  $-\text{CH}_2$ -[11+12]), 1.45–1.54 (2H, m,  $-\text{CH}_2$ -[10]), 3.23 (1H, t,  $J$  7.0  $-\text{CH}$ -[9]), 3.25 (1H, t,  $J$  6.6  $-\text{CH}$ -[9]), 3.52 (2H, s,  $-\text{CH}_2$ -[1]), 3.90 (1H, dd,  $J$  16.3, 5.9  $-\text{CH}$ -[6]), 3.97 (1H, d,  $J$  16.3, 5.9  $-\text{CH}$ -[6]), 4.06 (1H, s,  $-\text{CH}$ -[3]), 6.27 (1H, br s,  $-\text{NH}$ -[8]) and 7.47 (1H, br s,  $-\text{NH}$ -[5]);  $\delta_{\text{C}}$  (100 MHz;  $\text{CDCl}_3$ ;  $25^\circ\text{C}$ )  $\delta$  13.9, 21.0, 21.1, 22.3, 29.0, 29.0, 39.4, 39.7, 42.7, 70.4, 91.6, 169.2 and 174.5;  $m/z$  (ESI-MS)  $[\text{M}+\text{H}]^+$  275 (Calculated  $[\text{C}_{13}\text{H}_{27}\text{N}_2\text{O}_4]^+ = 275.20$ ); LC retention time 6.40 min.

LC-MS analysis:

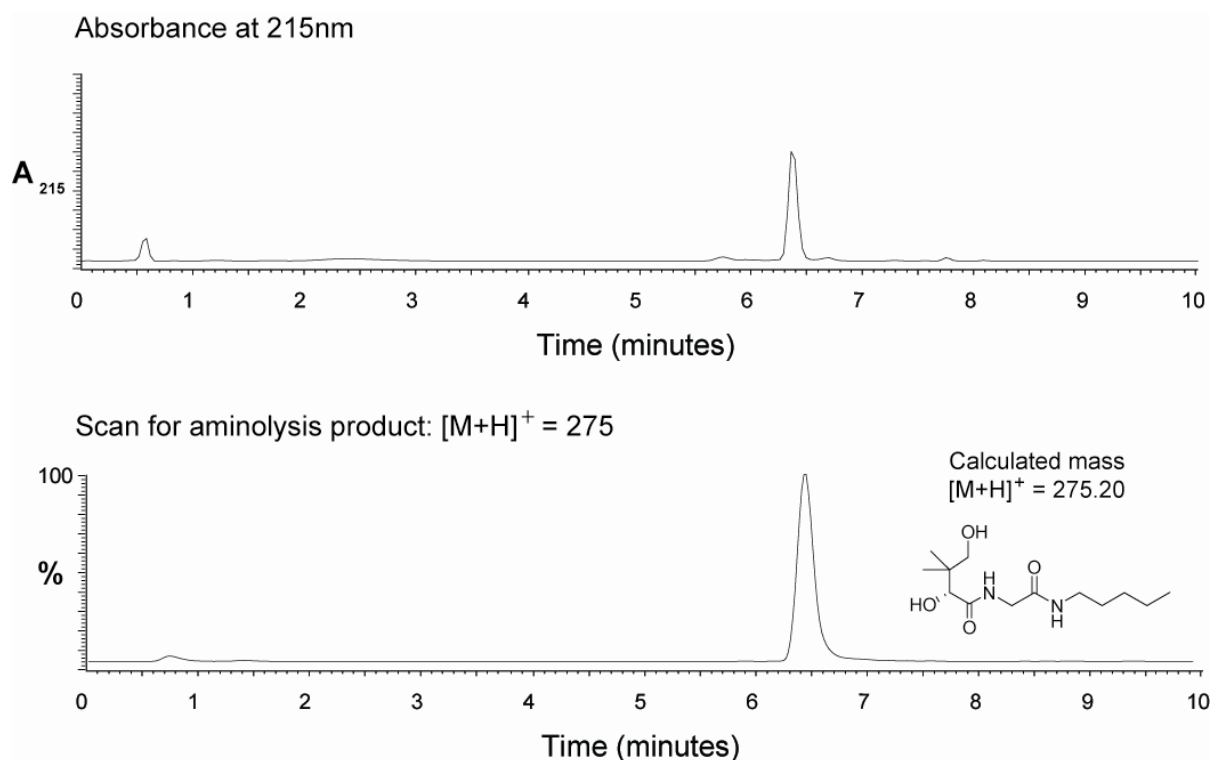

$^1\text{H}$  NMR (300 MHz):

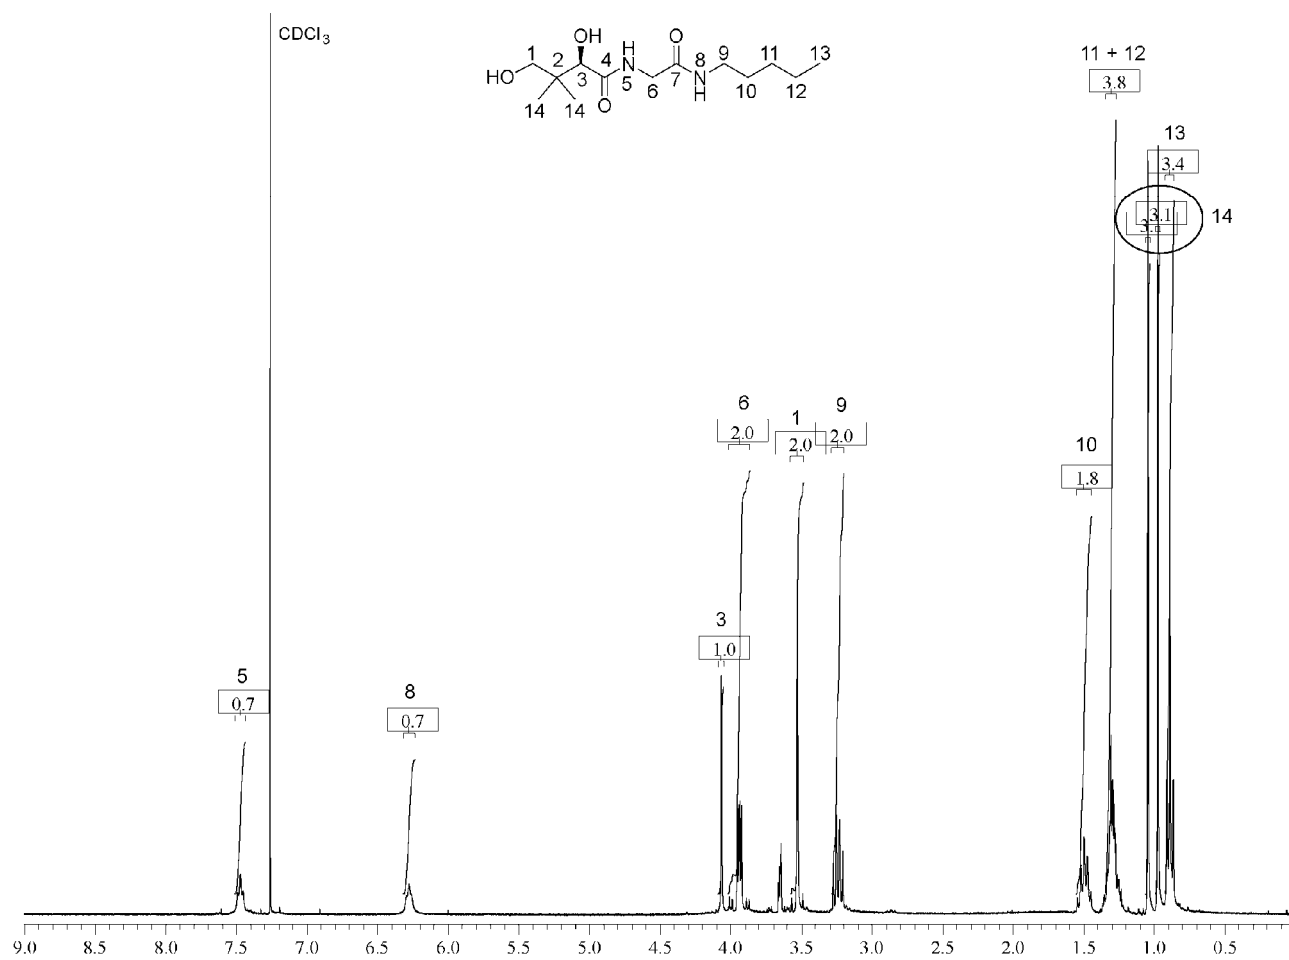

$^{13}\text{C}$  NMR (100 MHz):

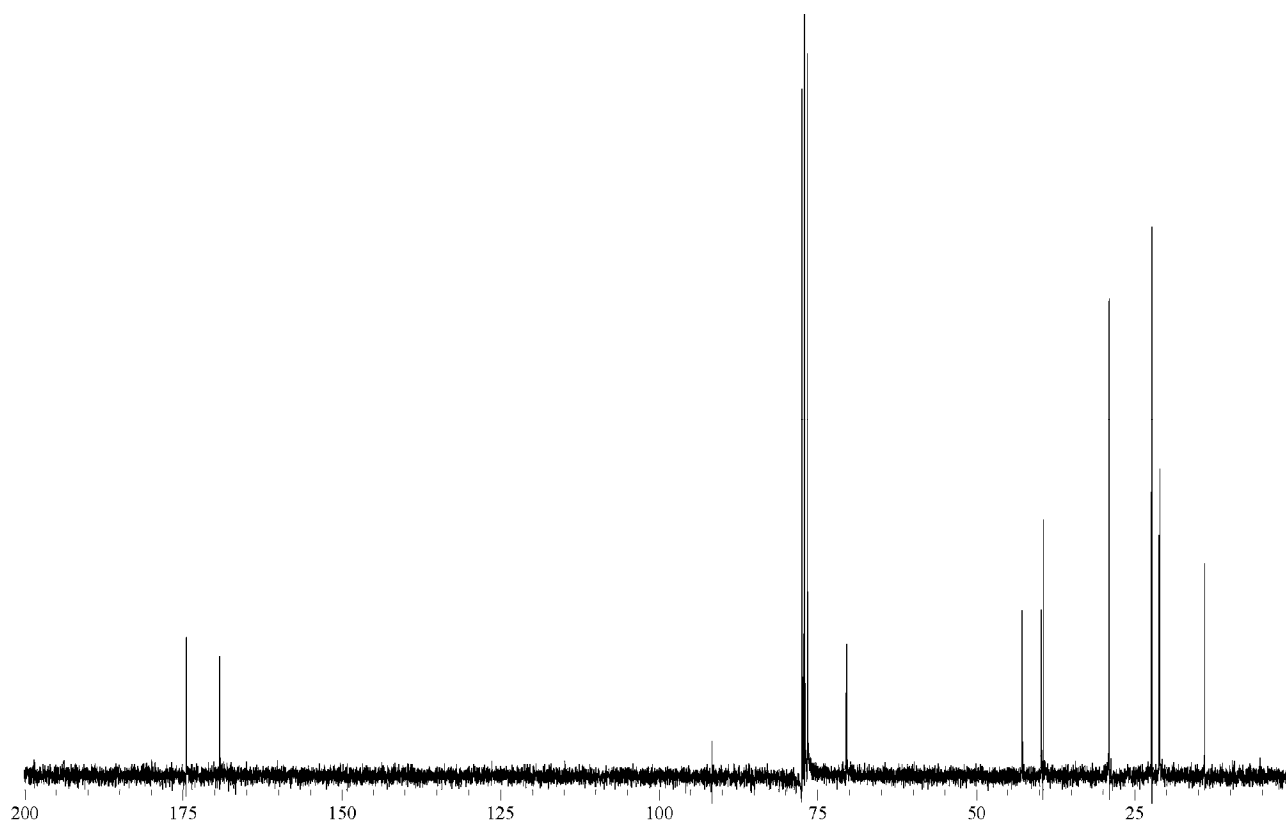***N*-Pentyl pantothenamide (4b)**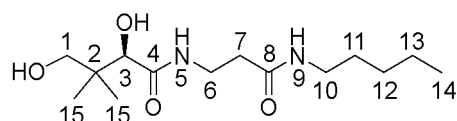

$\delta$ H (400 MHz; CDCl<sub>3</sub>; 25°C)  $\delta$  0.89 (3H, t, *J* 7.1, -CH<sub>3</sub>[14]), 0.92 (3H, s, -CH<sub>3</sub>[15]), 1.01 (3H, s, -CH<sub>3</sub>[15]), 1.27–1.34 (4H, m, -CH<sub>2</sub>-[12+13]), 1.46–1.52 (2H, m, -CH<sub>2</sub>-[11]), 2.43 (2H, t, *J* 6.1, -CH<sub>2</sub>-[7]), 3.21 (1H, t, *J* 7.3, -CH-[10]), 3.23 (1H, t, *J* 7.1, -CH-[10]), 3.49 (2H, s, -CH<sub>2</sub>-[1]), 3.53–3.60 (2H, m, -CH<sub>2</sub>-[6]), 3.99 (1H, s, -CH-[3]), 5.92 (1H, br s, -NH-[9]) and 7.40 (1H, br s, -NH-[5]);  $\delta$ C (100 MHz; CDCl<sub>3</sub>; 25°C)  $\delta$  13.9, 20.5, 21.2, 22.3, 29.0, 29.1, 35.3, 35.8, 39.2, 39.6, 70.7, 77.2, 171.4 and 173.9; *m/z* (ESI-MS) [M+H]<sup>+</sup> 289 (Calculated [C<sub>14</sub>H<sub>29</sub>N<sub>2</sub>O<sub>4</sub>]<sup>+</sup> = 289.21); LC retention time 6.48 min.

LC-MS analysis:

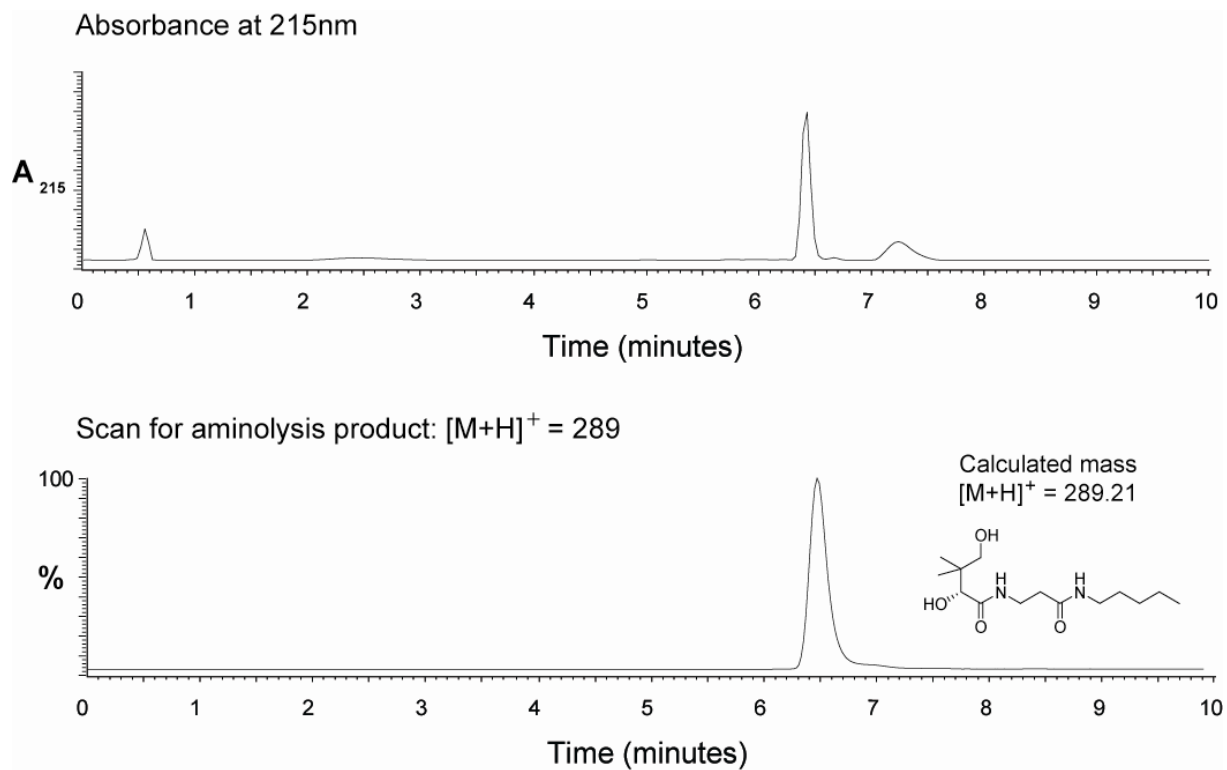

$^1\text{H}$  NMR (400 MHz):

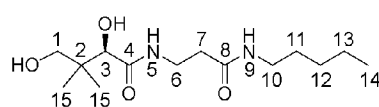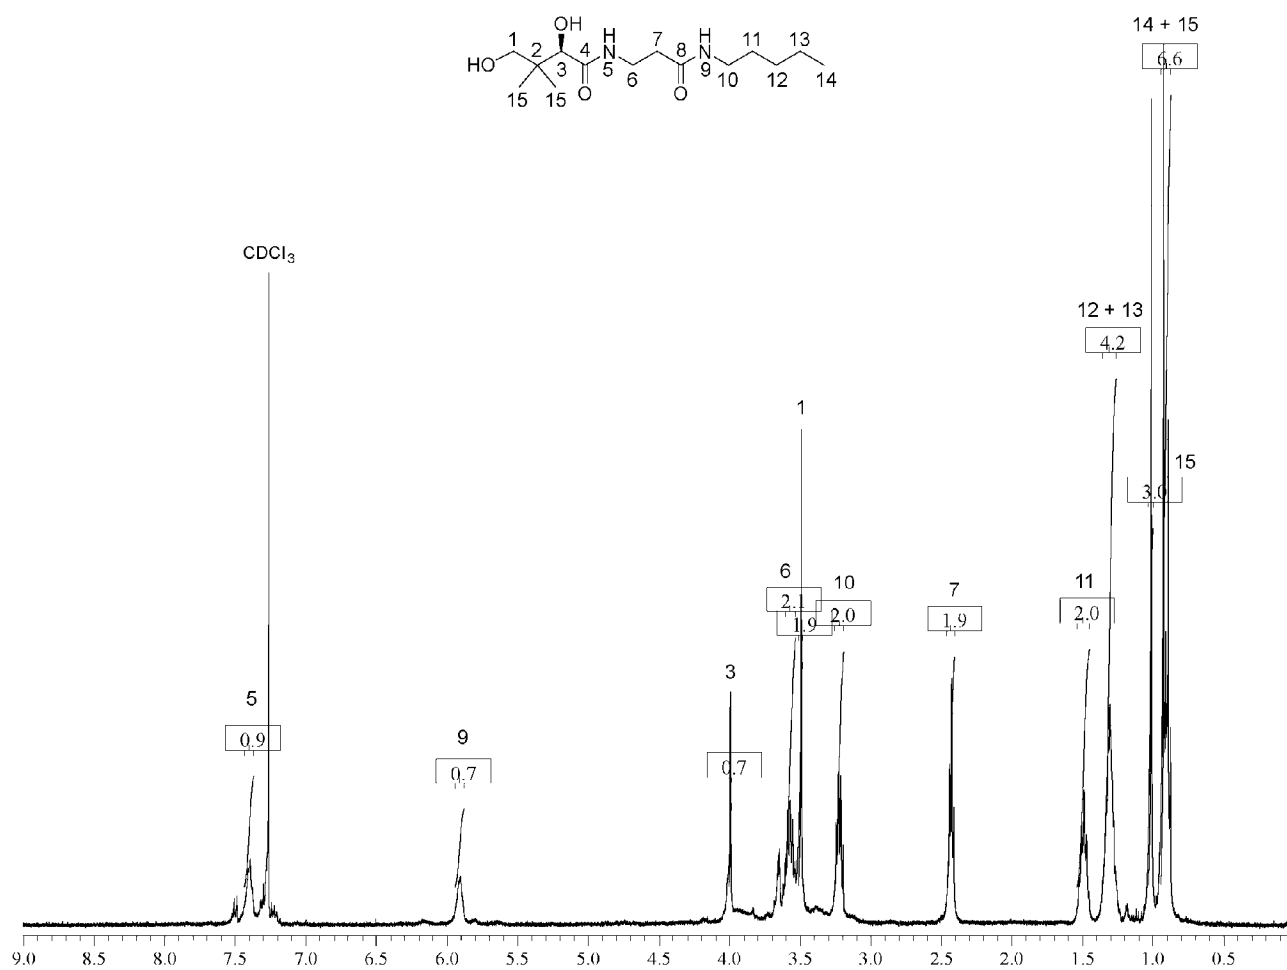

$^{13}\text{C}$  NMR (100 MHz):



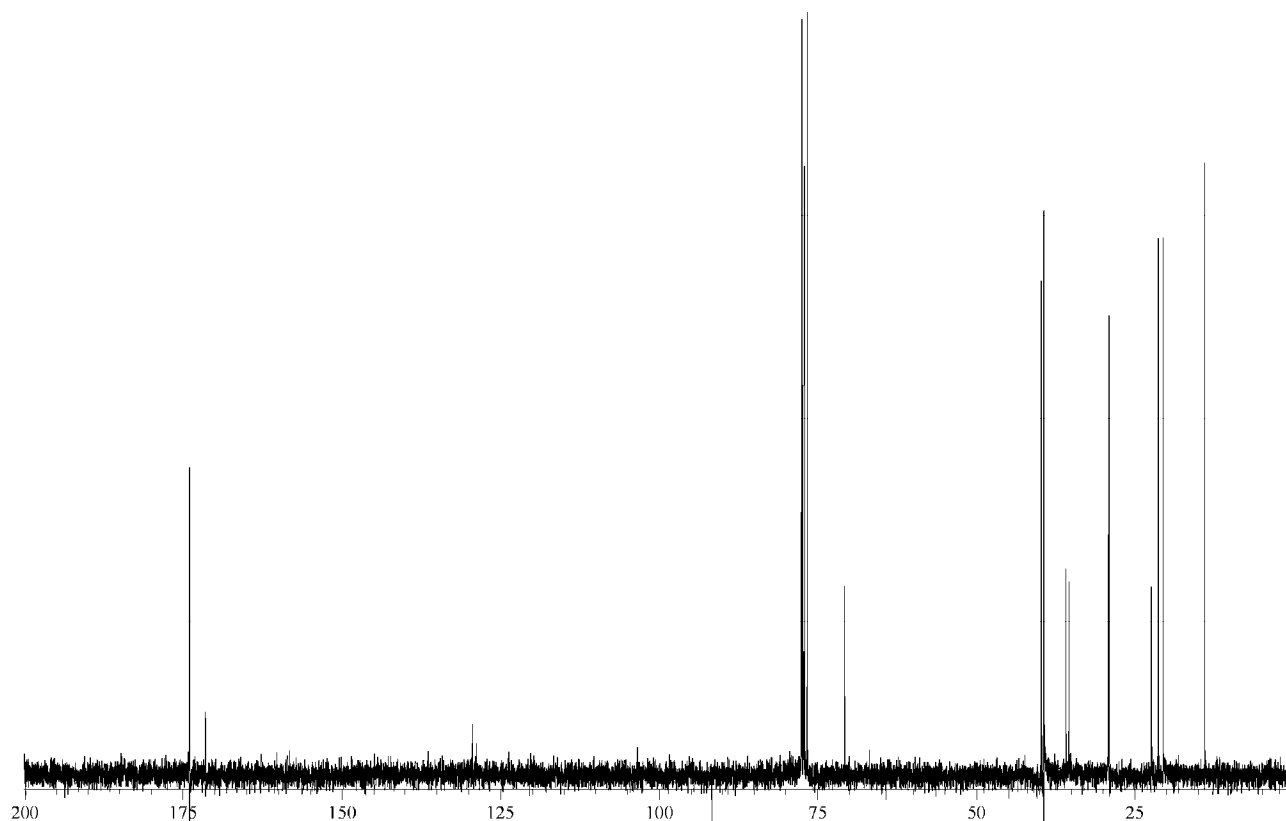***N*-Pentyl homopantothenamide (4c)**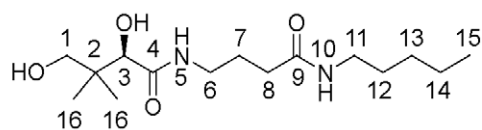

$\delta$ H (300 MHz; CDCl<sub>3</sub>; 25°C)  $\delta$  0.89 (3H, t, *J* 6.7, -CH<sub>3</sub>[15]), 0.93 (3H, s, -CH<sub>3</sub>[16]), 1.02 (3H, s, -CH<sub>3</sub>[16]), 1.22–1.38 (4H, m, -CH<sub>2</sub>-[13+14]), 1.46–1.55 (2H, m, -CH<sub>2</sub>-[12]), 1.81–1.90 (2H, m, -CH<sub>2</sub>-[7]), 2.22 (2H, t, *J* 6.7, -CH<sub>2</sub>-[8]), 3.22 (1H, t, *J* 6.5 -CH-[11]), 3.24 (1H, t, *J* 7.0 -CH-[11]), 3.33 (1H, t, *J* 6.4, -CH-[6]), 3.36 (1H, t, *J* 6.5, -CH-[6]), 3.51 (2H, s, -CH<sub>2</sub>-[1]), 4.02 (1H, s, -CH-[3]), 6.20 (1H, br s, -NH-[10]) and 7.20 (1H, br s, -NH-[5]);  $\delta$ C (100 MHz; CDCl<sub>3</sub>; 25°C)  $\delta$  14.0, 20.5, 21.3, 22.3, 25.8, 29.1, 29.1, 33.8, 38.4, 39.3, 39.7, 71.0, 77.3, 172.8 and 174.0; *m/z* (ESI-MS) [M+H]<sup>+</sup> 303 (Calculated [C<sub>15</sub>H<sub>31</sub>N<sub>2</sub>O<sub>4</sub>]<sup>+</sup> = 303.23); LC retention time 6.55 min.

LC-MS analysis:

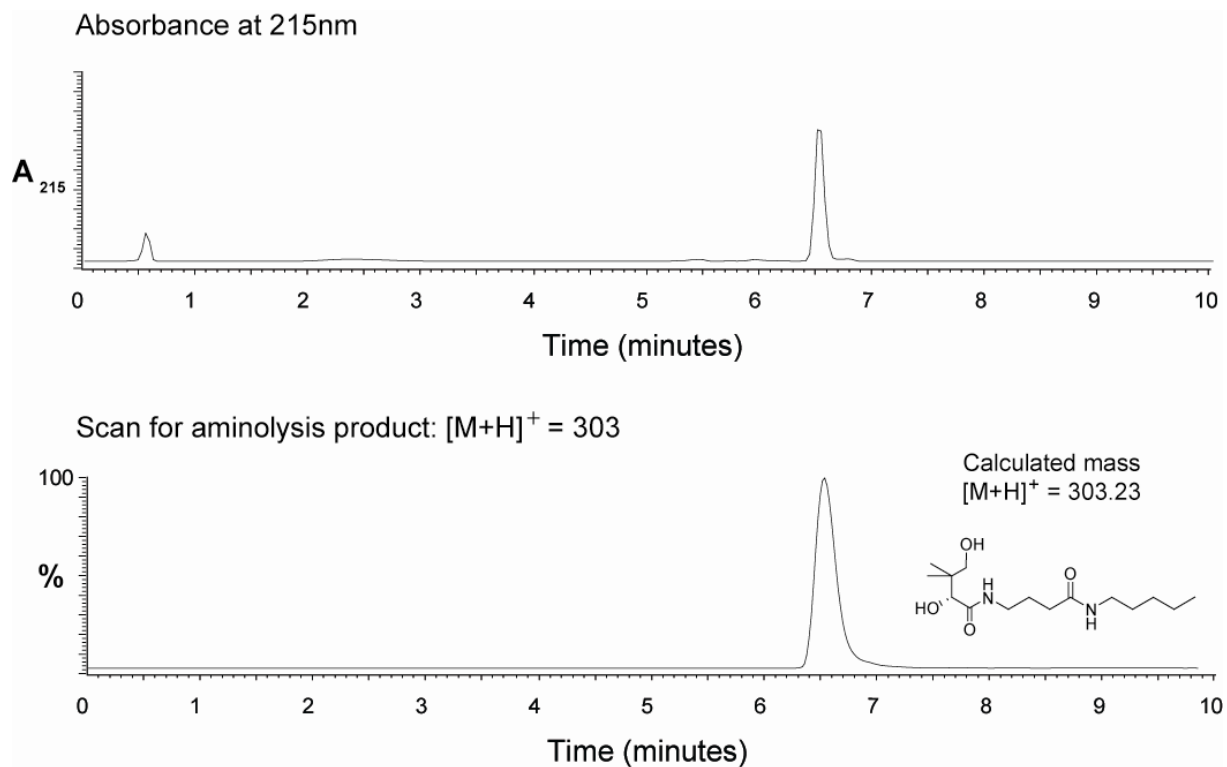

$^1\text{H}$  NMR (300 MHz):

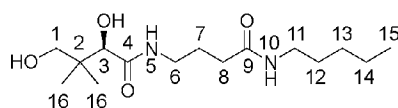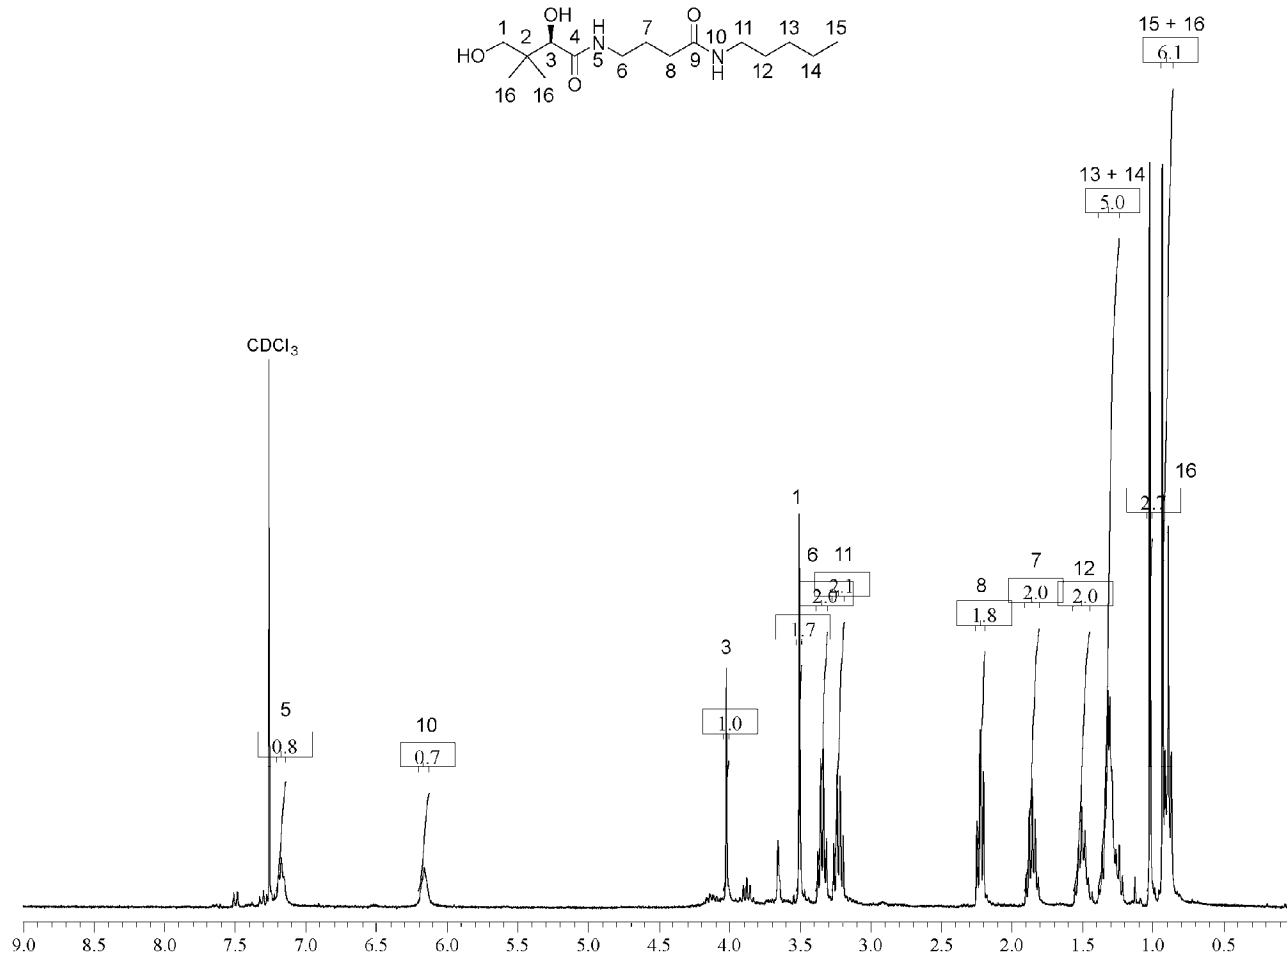

$^{13}\text{C}$  NMR (100 MHz):

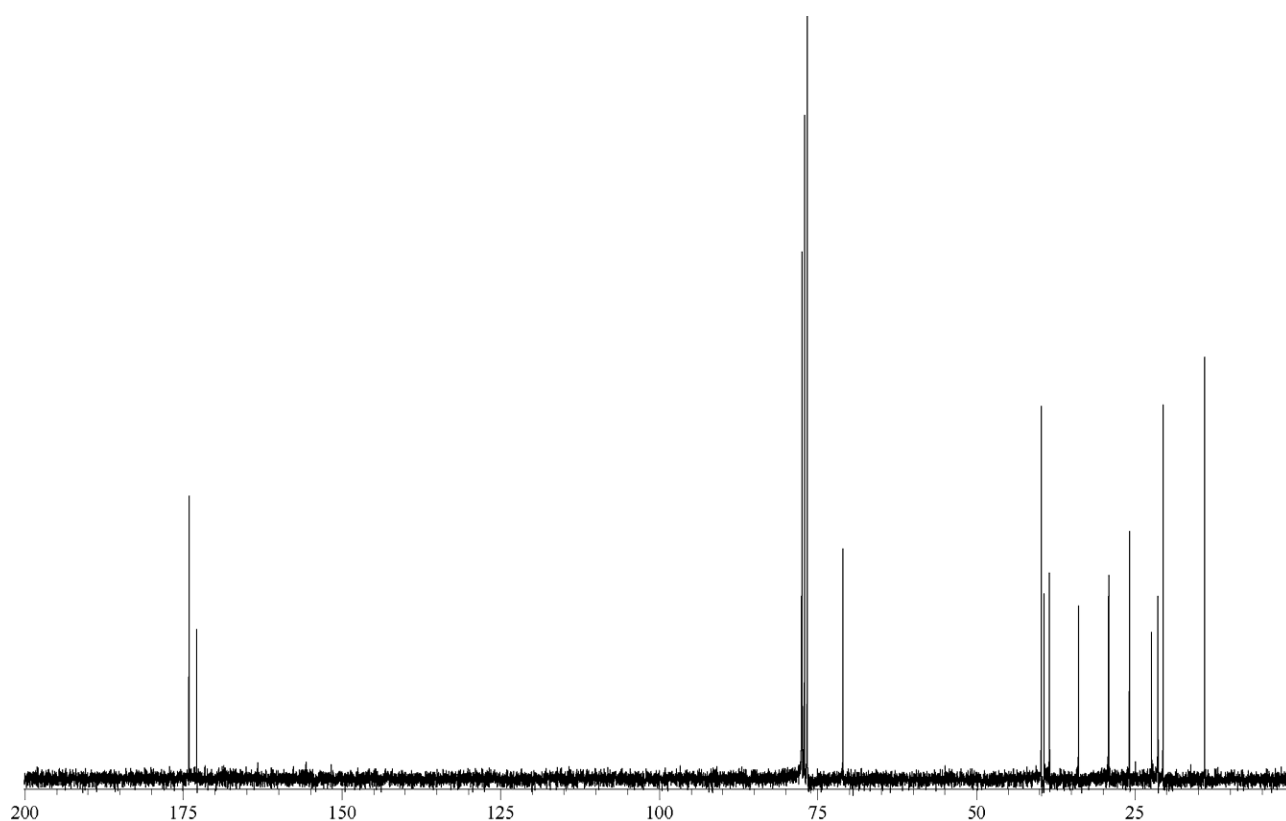

***N*-(3-Morpholin-4-yl-propyl)  $\alpha$ -pantothenamide (45a)**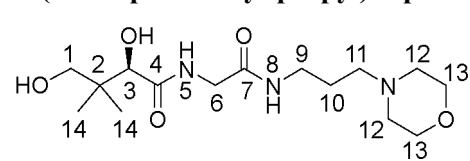

$\delta_{\text{H}}$  (300MHz;  $\text{CDCl}_3$ ; 25°C)  $\delta$  0.99 (3H, s,  $-\text{CH}_3$ [14]), 1.07 (3H, s,  $-\text{CH}_3$ [14]), 1.65–1.73 (2H, m,  $-\text{CH}_2$ -[10]), 2.39–2.51 (6H, m,  $-\text{CH}_2$ -[11+12]), 3.29–3.36 (2H, m,  $-\text{CH}_2$ -[9]), 3.48 (1H, d,  $J$  11.0,  $-\text{CH}$ -[1]), 3.53 (1H, d,  $J$  11.0,  $-\text{CH}$ -[1]), 3.71 (4H, t,  $J$  4.7,  $-\text{CH}_2$ -[13]), 3.89 (1H, dd,  $J$  16.3, 5.9  $-\text{CH}$ -[6]), 3.98 (1H, dd,  $J$  16.3, 5.9  $-\text{CH}$ -[6]), 4.01 (1H, s,  $-\text{CH}$ -[3]) and 7.35–7.43 (2H, m,  $-\text{NH}$ -[5+8]);  $\delta_{\text{C}}$  (100MHz;  $\text{CDCl}_3$ ; 25°C):  $\delta$  21.3, 21.6, 25.0, 38.7, 39.5, 42.6, 53.5, 56.8, 66.9, 70.0, 77.3, 169.1 and 174.2;  $m/z$  (ESI-MS)  $[\text{M}+\text{H}]^+$  332 (Calculated  $[\text{C}_{15}\text{H}_{30}\text{N}_3\text{O}_5]^+$  = 332.22); LC retention time 0.67 min.

LC-MS analysis:

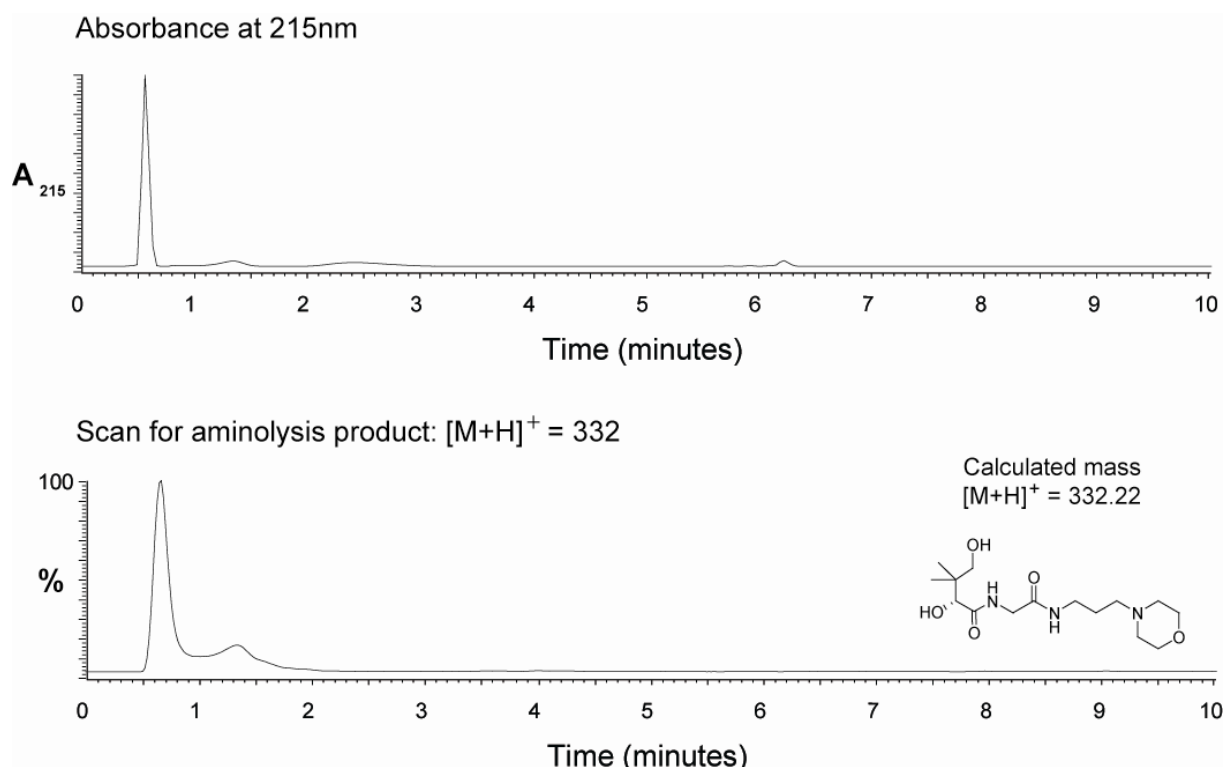

$^1\text{H}$  NMR (300 MHz):

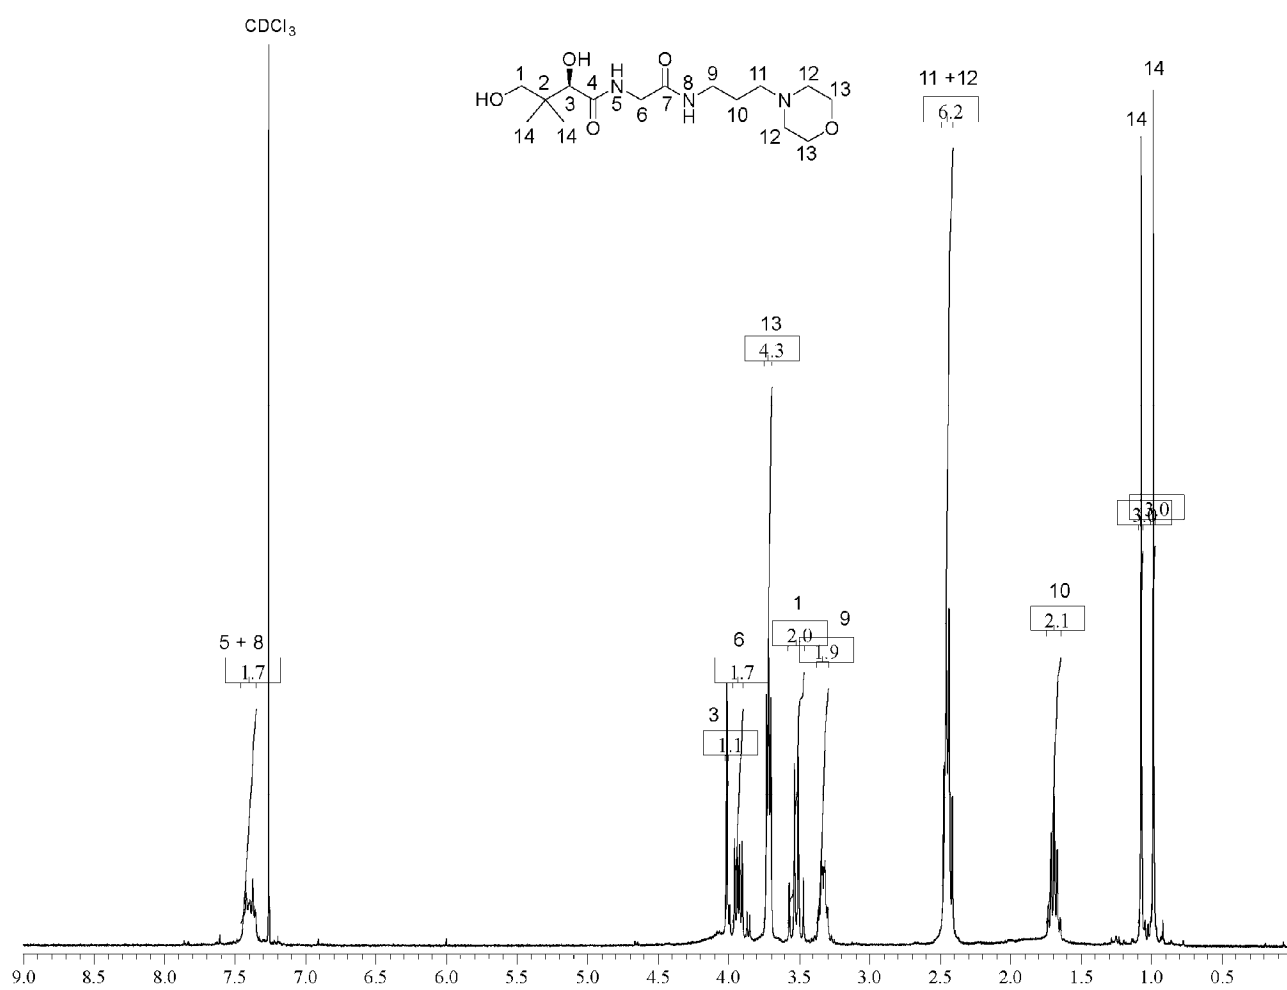

$^{13}\text{C}$  NMR (100 MHz):

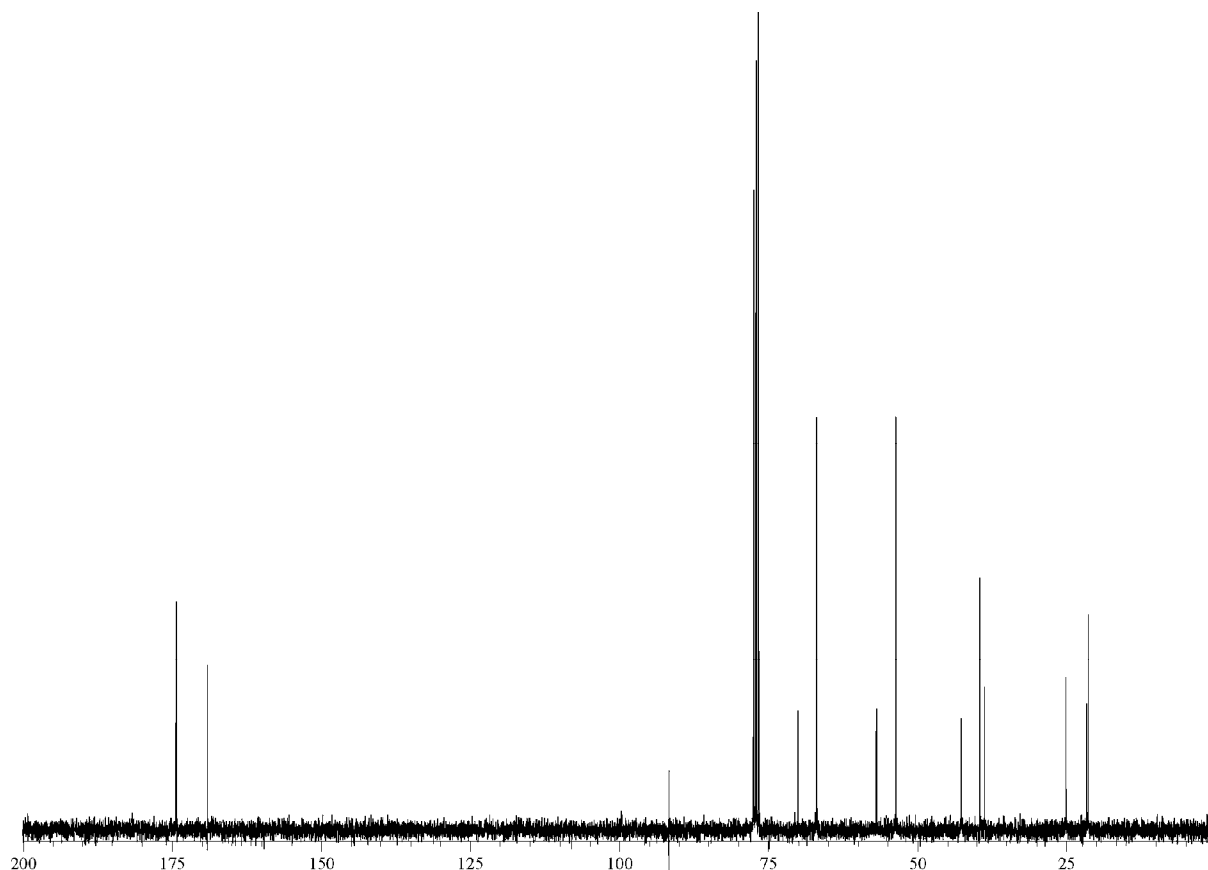***N*-(3-Morpholin-4-yl-propyl) pantothenamide (45b)**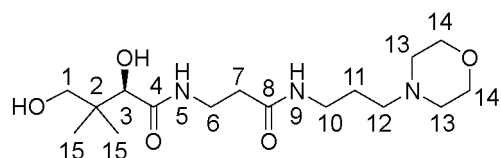

$\delta$ H (400 MHz;  $\text{CDCl}_3$ ; 25°C)  $\delta$  0.92 (3H, s,  $-\text{CH}_3$ [15]), 1.02 (3H, s,  $-\text{CH}_3$ [15]), 1.65–1.73 (2H, m,  $-\text{CH}_2$ [11]), 2.40–2.52 (8H, m,  $-\text{CH}_2$ -[7+12+13]), 3.19–3.27 (1H, m,  $-\text{CH}$ -[10]), 3.35–3.45 (1H, m,  $-\text{CH}$ -[10]), 3.47 (2H, s,  $-\text{CH}_2$ -[1]), 3.55–3.62 (2H, m,  $-\text{CH}_2$ -[6]), 3.67–3.78 (4H, m,  $-\text{CH}_2$ -[14]), 3.96 (2H, s,  $-\text{CH}$ -[3]), 7.05 (1H, br s,  $-\text{NH}$ -[9]) and 7.35 (1H, br s,  $-\text{NH}$ -[5]);  $\delta$ C (100 MHz;  $\text{CDCl}_3$ ; 25°C)  $\delta$

20.4, 21.5, 25.2, 35.4, 35.8, 38.8, 39.3, 53.5, 57.2, 66.8, 70.5, 77.1, 171.3 and 174.0;  $m/z$  (ESI-MS)  $[\text{M}+\text{H}]^+$  346 (Calculated  $[\text{C}_{16}\text{H}_{32}\text{N}_3\text{O}_5]^+ = 346.23$ ); LC retention time 0.67 min.

LC-MS analysis:

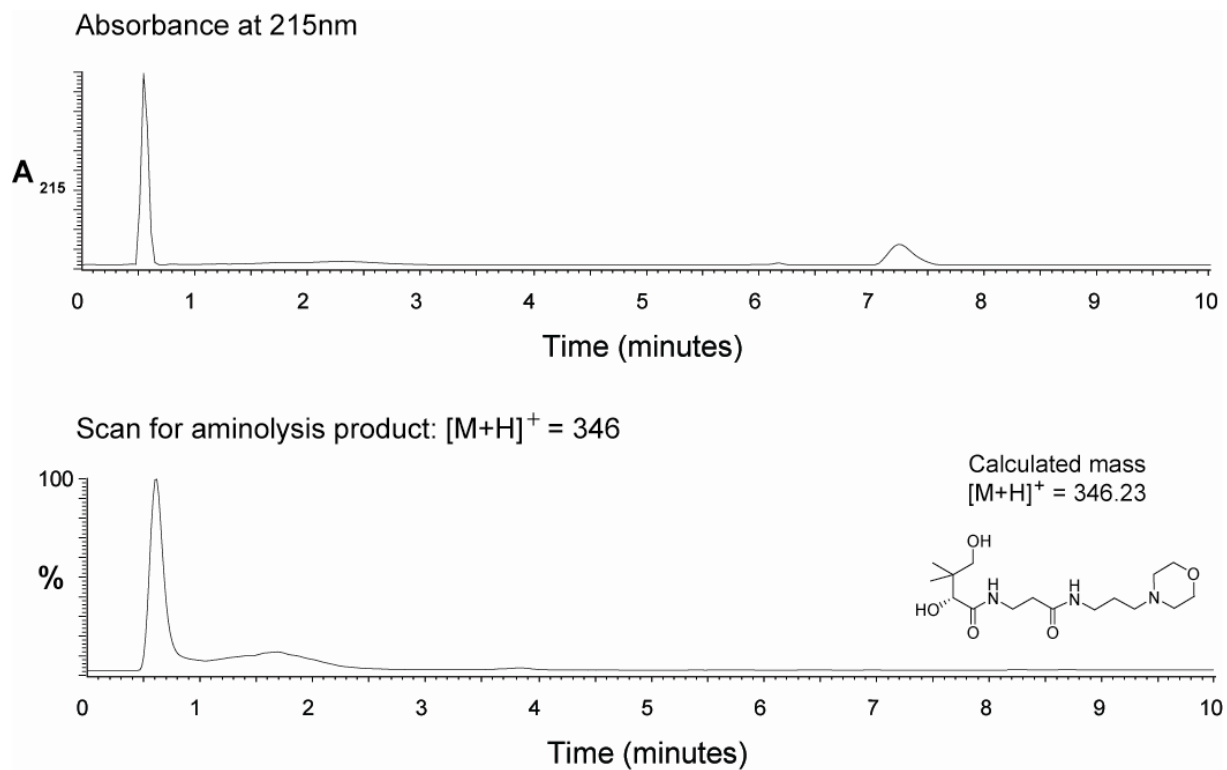

$^1\text{H}$  NMR (400 MHz):

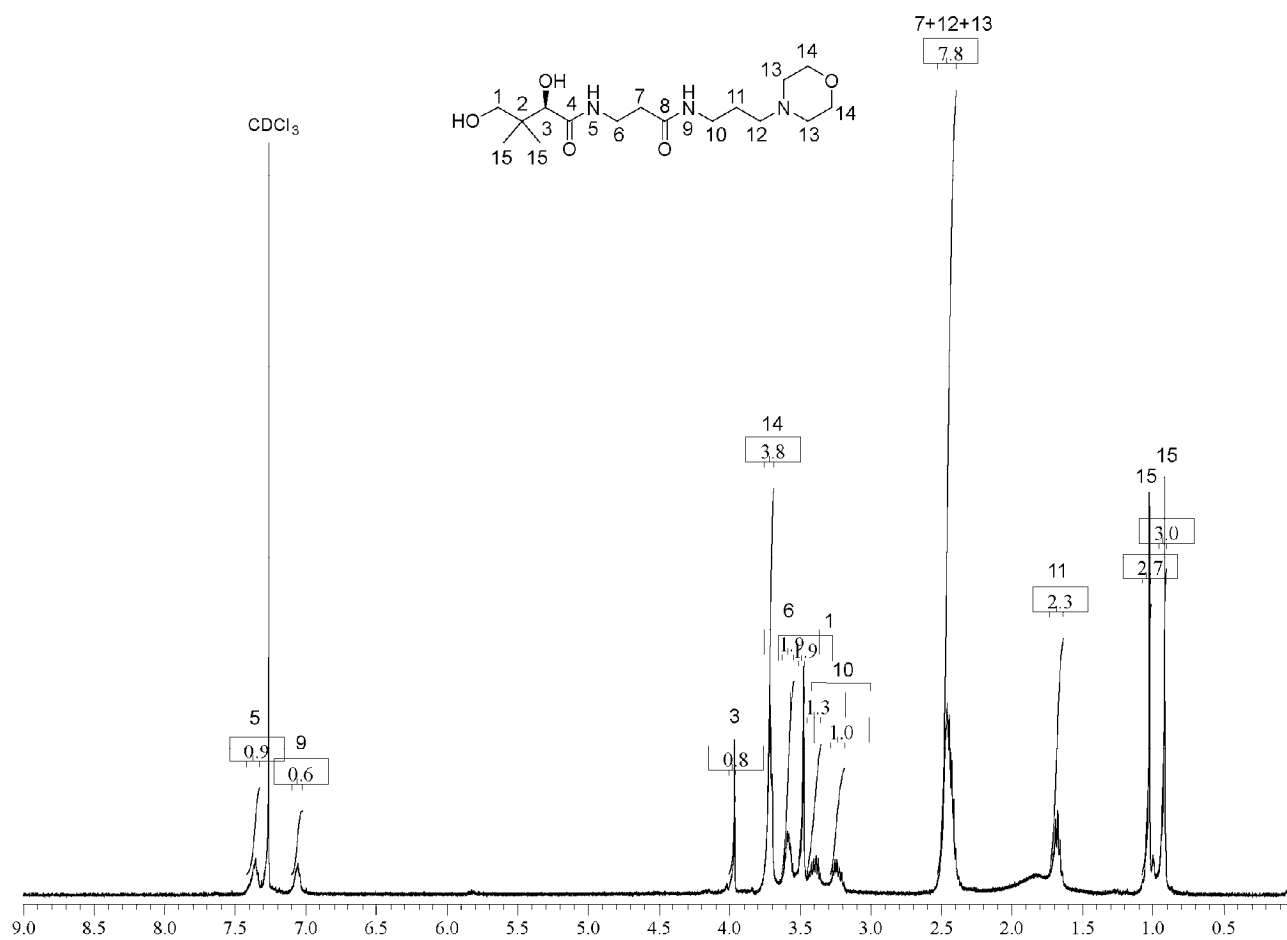

$^{13}\text{C}$  NMR (100 MHz):



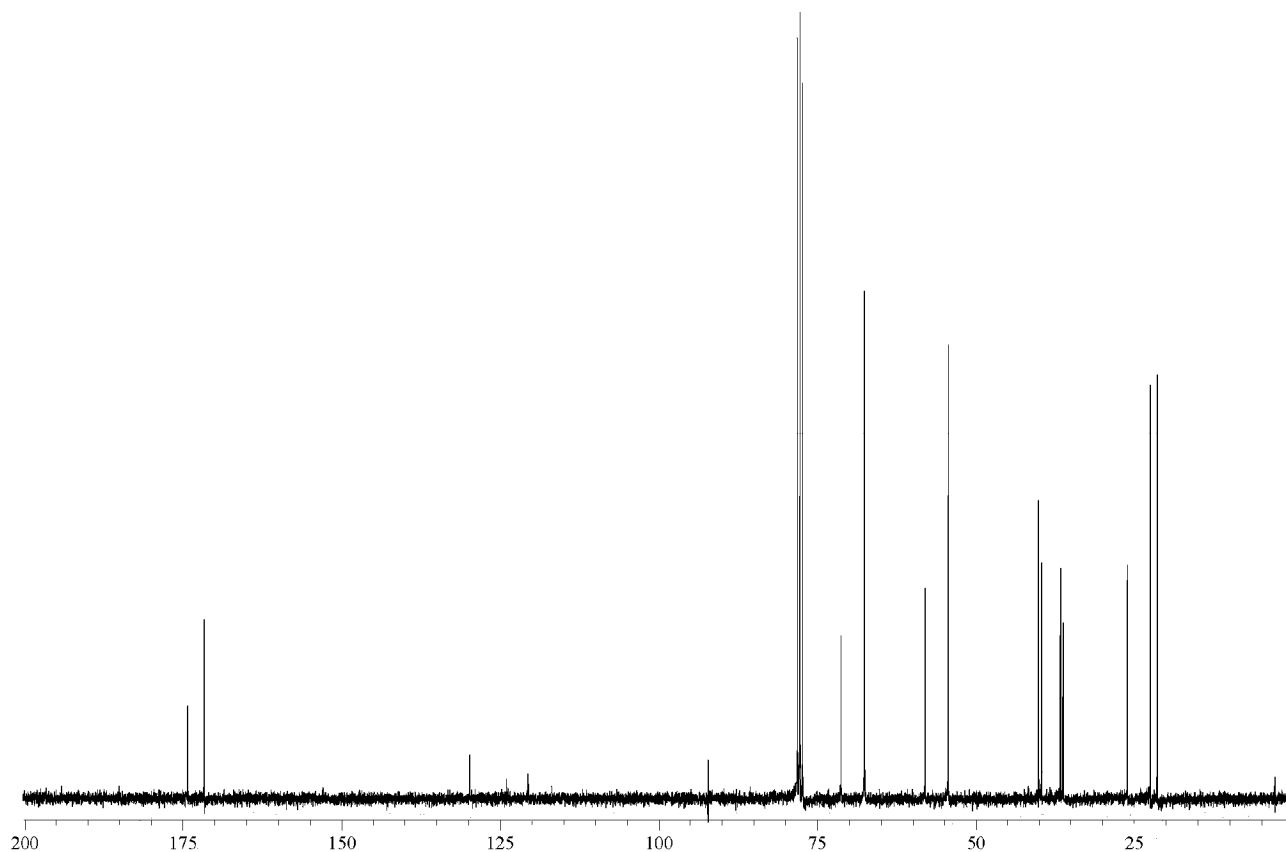

***N*-(3-Morpholin-4-yl-propyl) homopantothenamide (45c)**

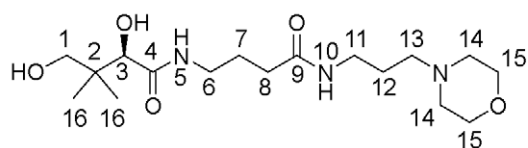

$\delta_{\text{H}}$  (300 MHz;  $\text{CDCl}_3$ ;  $25^\circ\text{C}$ )  $\delta$  0.93 (3H, s,  $-\text{CH}_3$ [16]), 1.02 (3H, s,  $-\text{CH}_3$ [16]), 1.65–1.73 (2H, m,  $-\text{CH}_2$ -[12]), 1.82–1.91 (2H, m,  $-\text{CH}_2$ -[7]), 2.23 (2H, t,  $J$  7.0,  $-\text{CH}_2$ -[8]), 2.41–2.48 (6H, m,  $-\text{CH}_2$ -[13+14]), 3.29–3.39 (4H, m,  $-\text{CH}_2$ -[6+11]), 3.49 (2H, s,  $-\text{CH}_2$ -[1]), 3.71 (4H, t,  $J$  9.1,  $-\text{CH}_2$ -[15]), 4.00 (1H, s,  $-\text{CH}$ -[3]), 7.19 (1H, br s,  $-\text{NH}$ -[10]) and 7.22 (1H, br s,  $-\text{NH}$ -[5]);  $\delta_{\text{C}}$  (100 MHz;  $\text{CDCl}_3$ ;

$25^\circ\text{C}$ )  $\delta$  20.5, 21.4, 25.0, 25.5, 34.0, 38.6, 39.0, 39.3, 53.6, 57.3, 66.9, 70.6, 77.4, 172.7 and 173.9;  $m/z$  (ESI-MS)  $[\text{M}+\text{H}]^+$  360 (Calculated  $[\text{C}_{17}\text{H}_{34}\text{N}_3\text{O}_5]^+ = 360.25$ ); LC retention time 0.68 min.

LC-MS analysis:

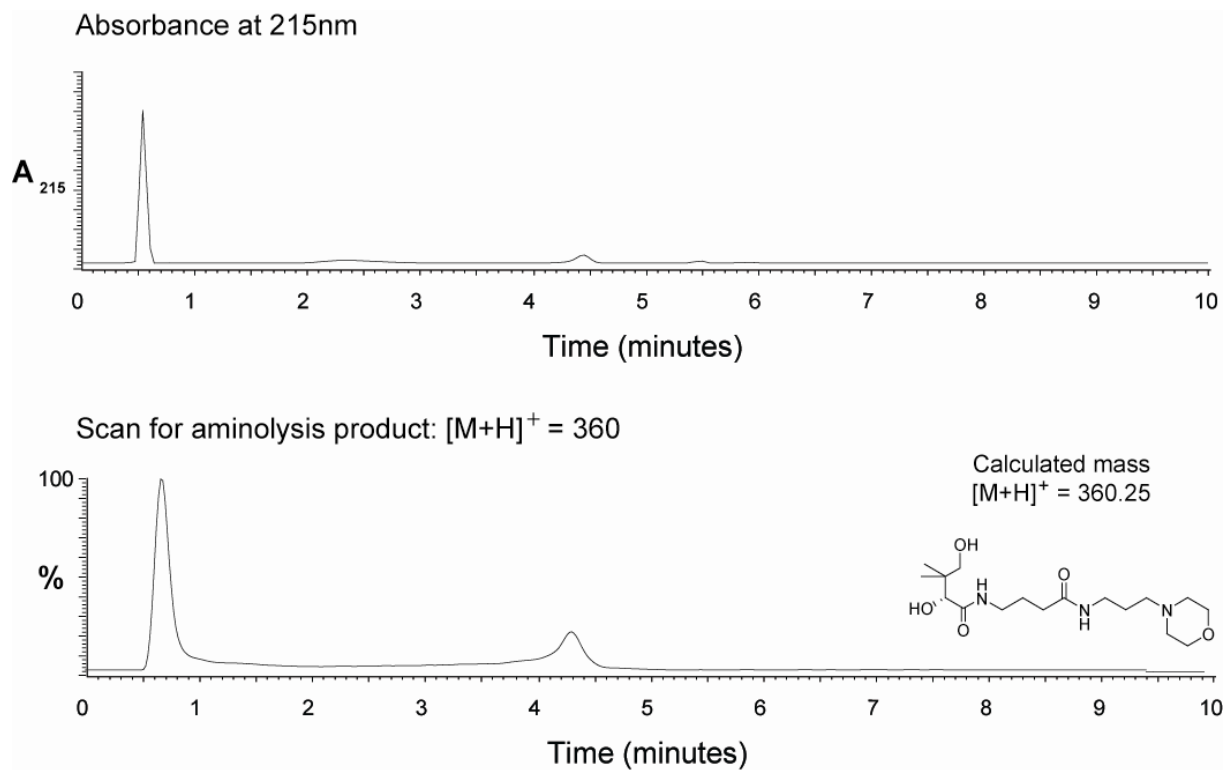

$^1\text{H}$  NMR (300 MHz):

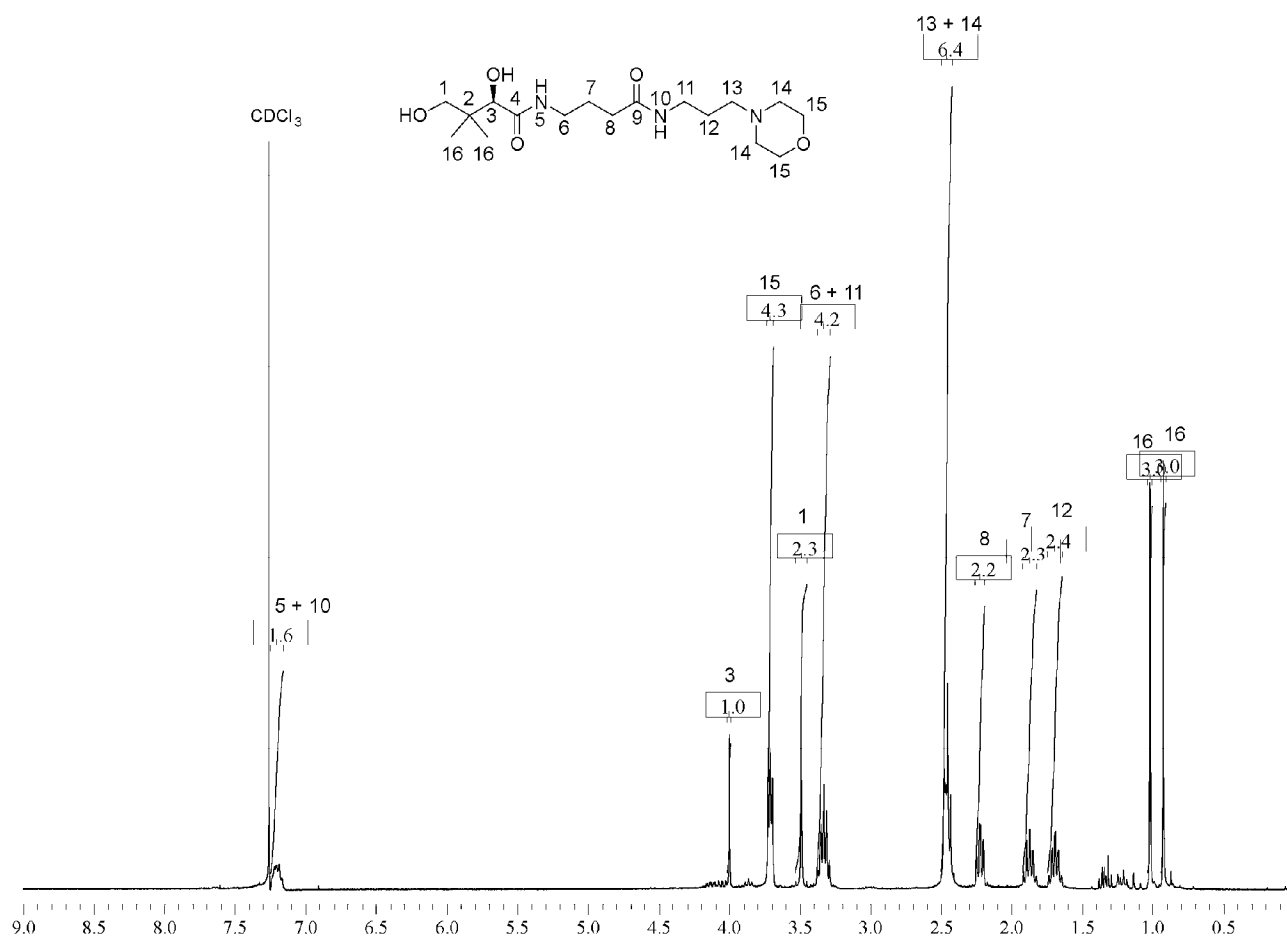

$^{13}\text{C}$  NMR (100 MHz):

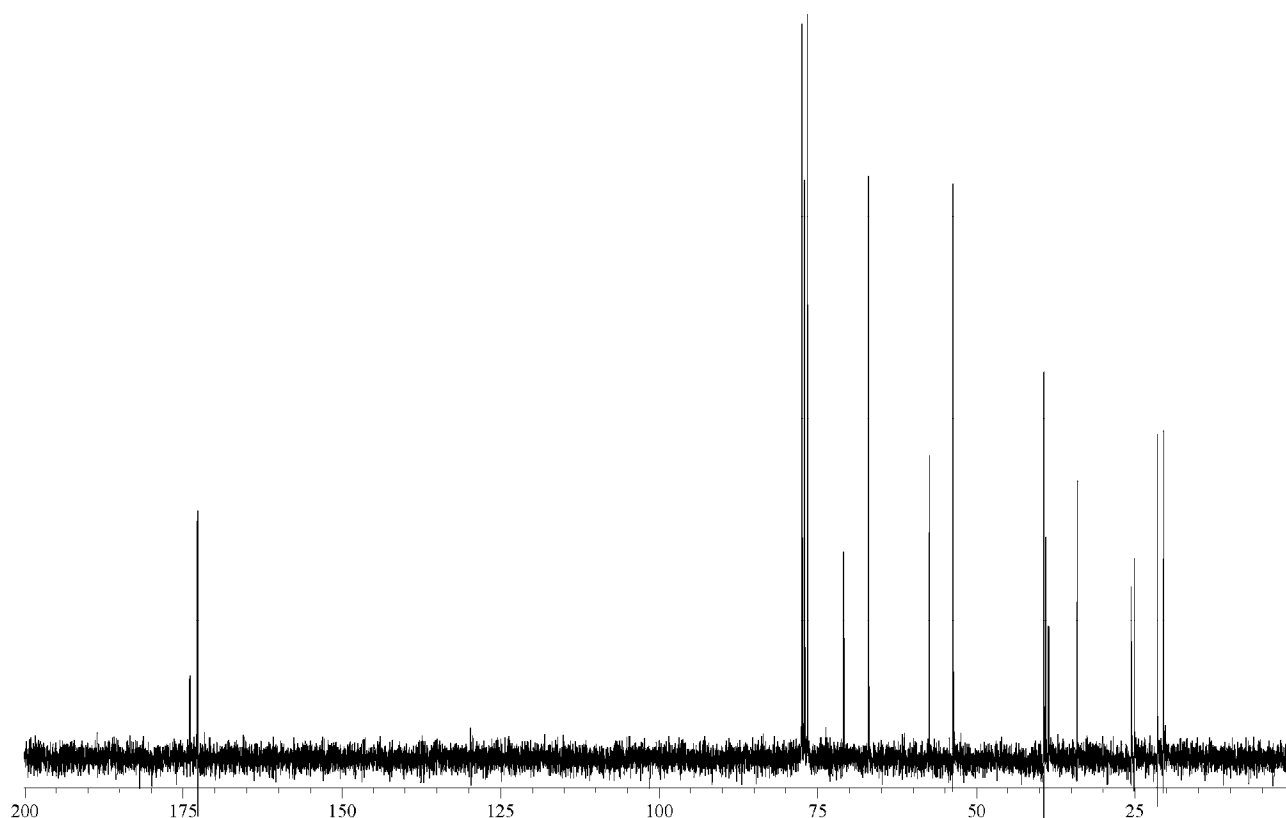

### *Optical purity of pantothenamides 4b and 45b*

To confirm that the pantothenamides prepared and purified by the two described methods do not racemize during the workup and purification procedures, pantothenamides **4b** and **45b** – each representing one of the two purification methods – were analyzed by  $^1\text{H}$  NMR in the presence of increasing amounts of the chiral shift reagent tris-[3-(trifluoromethylhydroxymethylene)-(+)-camphorato]europium ( $\text{Eu}(\text{tfc})_3$ ). The spectra resulting from the experiment with the amide **45b** are shown below. While the singlet peak at 3.96 ppm representing the proton on the chiral carbon atom (boxed signal below) shifts significantly downfield as the amount of  $\text{Eu}(\text{tfc})_3$  is increased, no separate peak can be observed, confirming the optical purity of the pantothenamide product.

A similar experiment with the amide **4b** gave identical results.

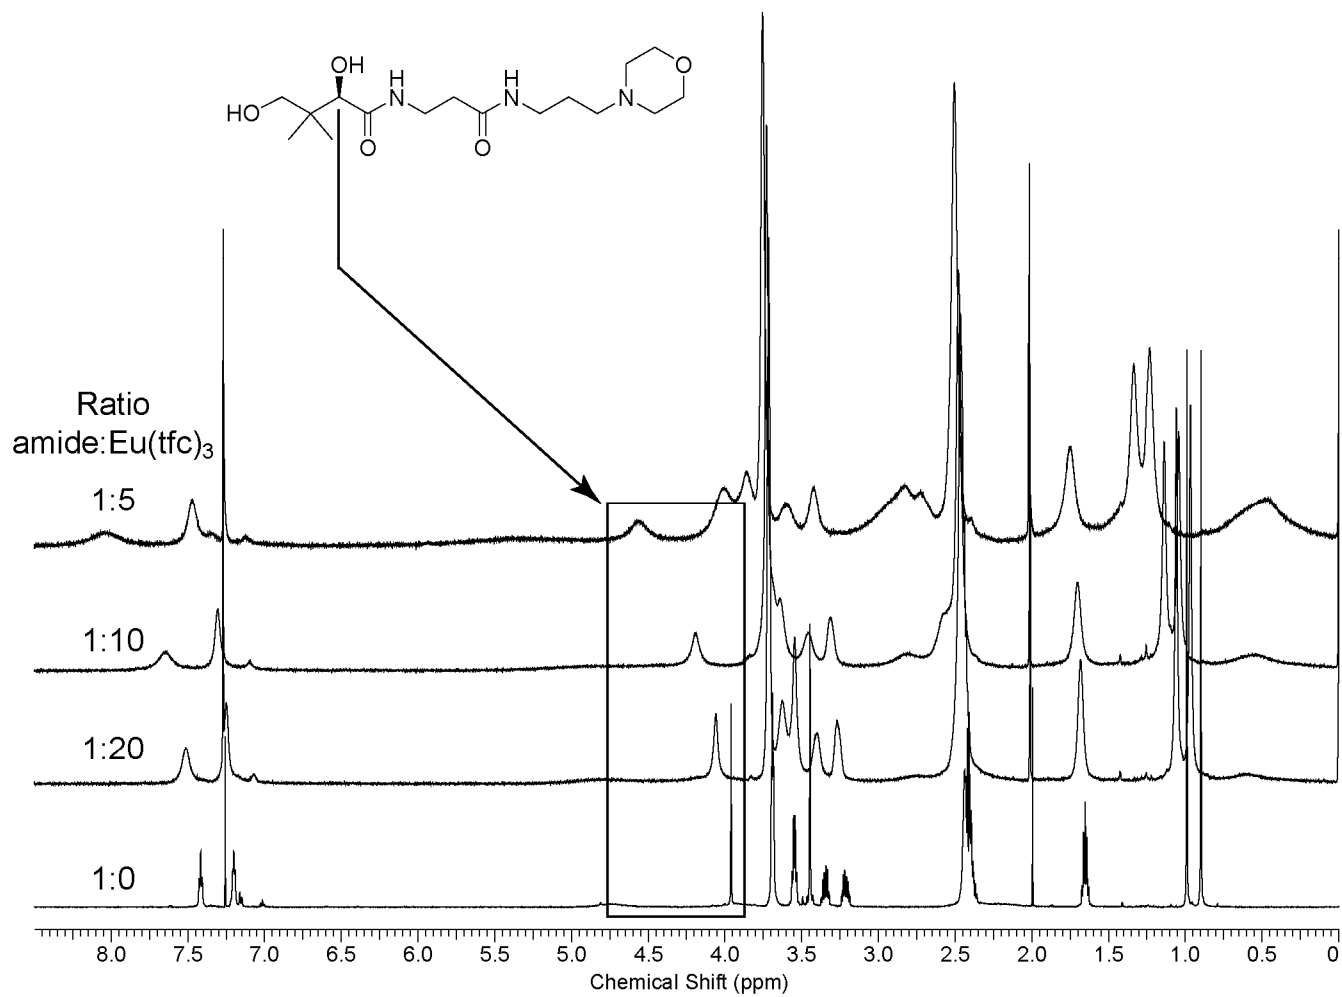

**Characterization of all other *N*-substituted pantothenamides**

All other pantothenamides were characterized by <sup>1</sup>H NMR; the corresponding data are reported below.

***N*-Propyl  $\alpha$ -pantothenamide (2a)**

$\delta_{\text{H}}$  (300 MHz; CDCl<sub>3</sub>; 25°C)  $\delta$  0.92 (3H, t, *J* 7.5), 0.97 (3H, s), 1.05 (3H, s), 1.47–1.58 (2H, m), 3.20 (1H, t, *J* 6.3), 3.22 (1H, t, *J* 6.8), 3.50 (1H, d, *J* 11.4), 3.55 (1H, d, *J* 11.4), 3.91 (1H, dd, *J* 5.9, 16.1), 3.98 (1H, dd, *J* 5.9, 16.1), 4.06 (1H, s), 6.31 (1H, br s) and 7.47 (1H, br s).

***N*-Propyl pantothenamide (2b)**

$\delta_{\text{H}}$  (400 MHz; CDCl<sub>3</sub>; 25°C)  $\delta$  0.92 (3H, t, *J* 7.6), 0.92 (3H, s), 1.01 (3H, s), 1.47–1.58 (2H, m), 2.43 (2H, t, *J* 5.9), 3.19 (1H, t, *J* 7.2), 3.20 (1H, t, *J* 6.0), 3.49 (2H, s), 3.53–3.61 (2H, m), 3.99 (1H, s), 5.93 (1H, br s) and 7.39 (1H, br s).

***N*-Propyl homopantothenamide (2c)**

$\delta_{\text{H}}$  (300 MHz; CDCl<sub>3</sub>; 25°C)  $\delta$  0.93 (3H, t, *J* 7.5), 0.93 (3H, s), 1.02 (3H, s), 1.47–1.58 (2H, m), 1.81–1.90 (2H, m), 2.23 (2H, t, *J* 6.8), 3.19 (1H, t, *J* 5.8), 3.22 (1H, t, *J* 7.0), 3.33 (1H, t, *J* 6.0), 3.36 (1H, t, *J* 6.2), 3.51 (2H, s), 4.02 (1H, s), 6.19 (1H, br s) and 7.17 (1H, br s).

***N*-Butyl  $\alpha$ -pantothenamide (3a)**

$\delta_{\text{H}}$  (300 MHz; CDCl<sub>3</sub>; 25°C)  $\delta$  0.91 (3H, t, *J* 7.3), 0.97 (3H, s), 1.04 (3H, s), 1.29–1.39 (2H, m), 1.43–1.53 (2H, m), 3.24 (1H, t, *J* 7.1), 3.26 (1H, t, *J* 7.0), 3.50 (1H, d, *J* 11.2), 3.54 (1H, d, *J* 11.2), 3.91 (1H, dd, *J* 5.9, 16.1), 3.98 (1H, dd, *J* 5.9, 16.1), 4.06 (1H, s), 6.29 (1H, br s) and 7.48 (1H, br s).

***N*-Butyl pantothenamide (3b)**

$\delta_{\text{H}}$  (400 MHz; CDCl<sub>3</sub>; 25°C)  $\delta$  0.92 (3H, t, *J* 7.3), 0.92 (3H, s), 1.01 (3H, s), 1.30–1.36 (2H, m), 1.47 (2H, dt, *J* 6.8, 7.3), 2.43 (2H, t, *J* 6.1), 3.22 (1H, t, *J* 7.3), 3.24 (1H, t, *J* 6.0), 3.49 (2H, s), 3.53–3.60 (2H, m), 3.99 (1H, s), 5.93 (1H, br s) and 7.40 (1H, br s).

***N*-Butyl homopantothenamide (3c)**

$\delta_{\text{H}}$  (300 MHz; CDCl<sub>3</sub>; 25°C)  $\delta$  0.92 (3H, t, *J* 7.2), 0.93 (3H, s), 1.03 (3H, s), 1.31–1.41 (2H, m), 1.44–1.54 (2H, m), 1.81–1.90 (2H, m), 2.23 (2H, t, *J* 6.9), 3.23 (1H, t, *J* 6.0), 3.25 (1H, t, *J* 7.1), 3.33 (1H, t, *J* 6.1), 3.36 (1H, t, *J* 6.5), 4.02 (1H, s), 6.14 (1H, br s) and 7.16 (1H, br s).

***N*-Hexyl  $\alpha$ -pantothenamide (5a)**

$\delta_{\text{H}}$  (300 MHz; CDCl<sub>3</sub>; 25°C)  $\delta$  0.88 (3H, t, *J* 6.7), 0.98 (3H, s), 1.05 (3H, s), 1.24–1.35 (6H, m), 1.44–1.54 (2H, m), 3.23 (1H, t, *J* 7.1), 3.25 (1H, t, *J* 6.7), 3.51 (1H, d, *J* 11.2), 3.53 (1H, d, *J* 11.2), 3.91 (1H, dd, *J* 5.9, 16.1), 3.98 (1H, dd, *J* 5.9, 16.1), 4.07 (1H, s), 6.23 (1H, br s) and 7.45 (1H, br s).

***N*-Hexyl pantothenamide (5b)**

$\delta_{\text{H}}$  (400 MHz; CDCl<sub>3</sub>; 25°C)  $\delta$  0.88 (3H, t, *J* 6.8), 0.92 (3H, s), 1.01 (3H, s), 1.26–1.32 (6H, m), 1.45–1.50 (2H, m), 2.42 (2H, t, *J* 6.1), 3.21 (1H, t, *J* 7.2), 3.23 (1H, t, *J* 5.9), 3.49 (2H, s), 3.53–3.60 (2H, m), 3.99 (1H, s), 5.90 (1H, br s) and 7.39 (1H, br s).

***N*-Hexyl homopantothenamide (5c)**

$\delta_{\text{H}}$  (300 MHz; CDCl<sub>3</sub>; 25°C)  $\delta$  0.88 (3H, t, *J* 6.6), 0.93 (3H, s), 1.02 (3H, s), 1.22–1.38 (6H, m), 1.43–1.54 (2H, m), 1.81–1.90 (2H, m), 2.22 (2H, t, *J* 6.9), 3.23 (1H, t, *J* 7.1), 3.25 (1H, t, *J* 6.6), 3.33 (1H, t, *J* 6.5), 3.36 (1H, t, *J* 6.2), 3.51 (2H, s), 4.02 (1H, s), 6.12 (1H, br s) and 7.17 (1H, br s).

***N*-Heptyl  $\alpha$ -pantothenamide (6a)**

$\delta_{\text{H}}$  (300 MHz; CDCl<sub>3</sub>; 25°C)  $\delta$  0.88 (3H, t, *J* 6.9), 0.98 (3H, s), 1.05 (3H, s), 1.24–1.28 (8H, m), 1.44–1.54 (2H, m), 3.23 (1H, t, *J* 6.7), 3.25 (1H, t, *J* 6.2), 3.51 (1H, d, *J* 11.4), 3.54 (1H, d, *J* 11.4), 3.91 (1H, dd, *J* 5.9, 16.4), 3.97 (1H, dd, *J* 5.9, 16.4), 4.07 (1H, s), 6.22 (1H, br s) and 7.44 (1H, br s).

***N*-Heptyl pantothenamide (6b)**

$\delta_{\text{H}}$  (400 MHz; CDCl<sub>3</sub>; 25°C)  $\delta$  0.88 (3H, t, *J* 7.1), 0.92 (3H, s), 1.01 (3H, s), 1.23–1.30 (8H, m), 1.46–1.50 (2H, m), 2.42 (2H, t, *J* 6.1), 3.23 (1H, t, *J* 7.0), 3.25 (2H, t, *J* 6.7), 3.49 (2H, s), 3.53–3.60 (2H, m), 3.99 (2H,

s), 5.91 (1H, br s) and 7.40 (1H, br s).

***N*-Heptyl homopantothenamide (6c)**

$\delta_{\text{H}}$  (300 MHz;  $\text{CDCl}_3$ ; 25°C)  $\delta$  0.88 (3H, t, *J* 6.6), 0.93 (3H, s), 1.03 (3H, s), 1.22–1.36 (8H, m), 1.43–1.54 (2H, m), 1.81–1.90 (2H, m), 2.22 (2H, t, *J* 6.8), 3.23 (1H, t, *J* 6.4), 3.25 (1H, t, *J* 7.2), 3.33 (1H, t, *J* 6.2), 3.36 (1H, t, *J* 6.2), 3.59 (2H, dd, *J* 11.4, 12.9), 4.02 (1H, s), 6.12 (1H, br s) and 7.15 (1H, br s).

***N*-Octyl  $\alpha$ -pantothenamide (7a)**

$\delta_{\text{H}}$  (300 MHz;  $\text{CDCl}_3$ ; 25°C)  $\delta$  0.88 (3H, t, *J* 6.7), 0.98 (3H, s), 1.05 (3H, s), 1.19–1.31 (10H, m), 1.44–1.53 (2H, m), 3.23 (1H, t, *J* 5.9), 3.25 (1H, t, *J* 6.9), 3.51 (1H, d, *J* 11.2), 3.53 (1H, d, *J* 11.2), 3.91 (1H, dd, *J* 5.9, 16.4), 3.98 (1H, dd, *J* 5.9, 16.4) and 4.07 (1H, s).

***N*-Octyl pantothenamide (7b)**

$\delta_{\text{H}}$  (400 MHz;  $\text{CDCl}_3$ ; 25°C)  $\delta$  0.88 (3H, t, *J* 7.1), 0.92 (3H, s), 1.01 (3H, s), 1.23–1.30 (10H, m), 1.45–1.50 (2H, m), 2.42 (2H, t, *J* 6.1), 3.21 (1H, t, *J* 6.0), 3.22 (1H, t, *J* 7.1), 3.49 (2H, s), 3.53–3.61 (2H, m), 3.99 (1H, s), 5.87 (1H, br s) and 7.38 (1H, br s).

***N*-Octyl homopantothenamide (7c)**

$\delta_{\text{H}}$  (300 MHz;  $\text{CDCl}_3$ ; 25°C)  $\delta$  0.87 (3H, t, *J* 6.7), 0.93 (3H, s), 1.03 (3H, s), 1.22–1.33 (10H, m), 1.43–1.55 (2H, m), 1.81–1.90 (2H, m), 2.22 (2H, t, *J* 6.7), 3.23 (1H, t, *J* 7.1), 3.25 (1H, t, *J* 6.7), 3.33 (1H, t, *J* 6.3), 3.36 (1H, t, *J* 6.2), 3.51 (2H, s), 4.02 (1H, s), 6.14 (1H, br s) and 7.16 (1H, br s).

***N*-tert-Butyl  $\alpha$ -pantothenamide (8a)**

$\delta_{\text{H}}$  (300 MHz;  $\text{CDCl}_3$ ; 25°C)  $\delta$  0.98 (3H, s), 1.05 (3H, s), 1.35 (9H, s), 3.53 (2H, s), 3.81 (1H, dd, *J* 5.9, 16.1), 3.92 (1H, dd, *J* 5.9, 16.1), 4.07 (1H, s), 5.82 (1H, br s) and 7.40 (1H, br s).

***N*-tert-Butyl pantothenamide (8b)**

No product formed

***N*-tert-Butyl homopantothenamide (8c)**

No product formed

***N*-Isopropyl  $\alpha$ -pantothenamide (9a)**

$\delta_{\text{H}}$  (300 MHz;  $\text{CDCl}_3$ ; 25°C)  $\delta$  0.98 (3H, s), 1.06 (3H, s), 1.15 (6H, d, *J* 6.5), 3.51 (1H, d, *J* 11.2), 3.56 (1H, d, *J* 11.2), 3.87 (1H, dd, *J* 5.9, 16.4), 3.97 (1H, dd, *J* 5.9, 16.4), 3.98–4.11 (1H, m), 4.08 (1H, s), 5.93 (1H, br s) and 7.39 (1H, br s).

***N*-Isopropyl pantothenamide (9b)**

$\delta_{\text{H}}$  (400 MHz;  $\text{CDCl}_3$ ; 25°C)  $\delta$  0.93 (3H, s), 1.01 (3H, s), 1.14 (6H, d, *J* 6.3), 2.40 (2H, t, *J* 6.1), 3.49 (2H, s), 3.53–3.60 (2H, m), 3.99 (1H, s), 3.98–4.08 (1H, m), 5.71 (1H, br s) and 7.38 (1H, br s).

***N*-Isopropyl homopantothenamide (9c)**

$\delta_{\text{H}}$  (300 MHz;  $\text{CDCl}_3$ ; 25°C)  $\delta$  0.94 (3H, s), 1.03 (3H, s), 1.16 (6H, d, *J* 6.7), 1.81–1.90 (2H, m), 2.20 (2H, t, *J* 6.9), 3.32 (1H, t, *J* 5.1), 3.37 (1H, t, *J* 6.5), 3.49 (1H, d, *J* 11.1), 3.53 (1H, d, *J* 11.1), 4.02 (1H, s), 4.02–4.09 (1H, m), 5.88 (1H, br s) and 7.16 (1H, br s).

***N*-sec-Butyl  $\alpha$ -pantothenamide (10a)**

$\delta_{\text{H}}$  (300 MHz;  $\text{CDCl}_3$ ; 25°C)  $\delta$  0.89 (3H, t, *J* 7.4), 0.97 (3H, s), 1.04 (3H, s), 1.12 (3H, d, *J* 6.7), 1.46 (2H, q, *J* 7.4), 3.52 (2H, s), 3.83–4.00 (3H, m), 4.07 (1H, s), 6.04 (1H, br s) and 7.48 (1H, br s).

***N*-sec-Butyl pantothenamide (10b)**

$\delta_{\text{H}}$  (400 MHz;  $\text{CDCl}_3$ ; 25°C)  $\delta$  0.89 (3H, t, *J* 7.3), 0.92 (3H, s), 1.01 (3H, s), 1.11 (3H, d, *J* 6.3), 1.45 (2H, q, *J* 7.3), 2.42 (2H, t, *J* 5.9), 3.49 (2H, s), 3.53–3.61 (2H, m), 3.86–3.90 (1H, m), 3.99 (1H, s), 5.64 (1H, br s) and 7.40 (1H, br s).

***N*-sec-Butyl homopantothenamide (10c)**

$\delta_{\text{H}}$  (300 MHz;  $\text{CDCl}_3$ ; 25°C)  $\delta$  0.90 (3H, t, *J* 7.5), 0.94 (3H, s), 1.03 (3H, s), 1.13 (3H, d, *J* 6.5), 1.42–1.52

(2H, m), 1.82–1.91 (2H, m), 2.22 (2H, t, *J* 6.9), 3.33 (1H, t, *J* 6.1), 3.37 (1H, t, *J* 6.4), 3.49 (1H, d, *J* 11.3), 3.53 (1H, d, *J* 11.3), 3.86–3.94 (1H, m), 4.03 (1H, s), 5.84 (1H, br s) and 7.16 (1H, br s).

***N*-Isobutyl  $\alpha$ -pantothenamide (*I1a*)**

$\delta_{\text{H}}$  (300 MHz; CDCl<sub>3</sub>; 25°C)  $\delta$  0.90 (6H, d, *J* 6.7), 0.97 (3H, s), 1.04 (3H, s), 1.70–1.83 (1H, m), 3.07 (1H, d, *J* 6.1), 3.09 (1H, d, *J* 6.8), 3.53 (2H, s), 3.93 (1H, dd, *J* 5.9, 16.4), 3.99 (1H, dd, *J* 5.9, 16.4), 4.07 (1H, s), 6.35 (1H, br s) and 7.49 (1H, br s).

***N*-Isobutyl pantothenamide (*I1b*)**

$\delta_{\text{H}}$  (400 MHz; CDCl<sub>3</sub>; 25°C)  $\delta$  0.91 (6H, d, *J* 6.3), 0.92 (3H, s), 1.01 (3H, s), 1.72–1.79 (1H, m), 2.45 (2H, t, *J* 5.9), 3.06 (1H, d, *J* 6.2), 3.07 (1H, d, *J* 6.6), 3.49 (2H, s), 3.54–3.61 (2H, m), 3.99 (1H, s), 5.95 (1H, br s) and 7.40 (1H, br s).

***N*-Isobutyl homopantothenamide (*I1c*)**

$\delta_{\text{H}}$  (300 MHz; CDCl<sub>3</sub>; 25°C)  $\delta$  0.90 (3H, s), 0.93 (3H, s), 0.94 (3H, s), 1.02 (3H, s), 1.70–1.84 (1H, m), 1.82–1.91 (2H, m), 2.24 (2H, t, *J* 6.9), 3.07 (1H, t, *J* 6.1), 3.08 (1H, t, *J* 5.8), 3.34 (1H, t, *J* 6.4), 3.36 (1H, t, *J* 6.4), 3.51 (2H, s), 4.02 (1H, s), 6.23 (1H, br s) and 7.18 (1H, br s).

***N*-(1-Methyl-butyl)  $\alpha$ -pantothenamide (*I2a*)**

$\delta_{\text{H}}$  (300 MHz; CDCl<sub>3</sub>; 25°C)  $\delta$  0.90 (3H, t, *J* 7.0), 0.98 (3H, s), 1.05 (3H, s), 1.12 (3H, d, *J* 6.7), 1.23–1.45 (4H, m), 3.53 (2H, s), 3.84–4.01 (3H, m), 4.07 (1H, s), 6.00 (1H, br s) and 7.46 (1H, br s).

***N*-(1-Methyl-butyl) pantothenamide (*I2b*)**

$\delta_{\text{H}}$  (400 MHz; CDCl<sub>3</sub>; 25°C)  $\delta$  0.90 (3H, t, *J* 7.1), 0.92 (3H, s), 1.01 (3H, s), 1.10 (3H, d, *J* 6.8), 1.29–1.35 (2H, m), 1.37–1.42 (2H, m), 2.41 (2H, t, *J* 5.9), 3.49 (2H, s), 3.53–3.60 (2H, m), 3.94–3.98 (1H, m), 3.99 (1H, s), 5.63 (1H, br s) and 7.40 (1H, br s).

***N*-(1-Methyl-butyl) homopantothenamide (*I2c*)**

$\delta_{\text{H}}$  (300 MHz; CDCl<sub>3</sub>; 25°C)  $\delta$  0.91 (3H, t, *J* 7.6), 0.93 (3H, s), 1.03 (3H, s), 1.13 (3H, d, *J* 6.5), 1.29–1.46 (4H, m), 1.82–1.91 (2H, m), 2.12 (2H, t, *J* 6.7), 3.33 (1H, t, *J* 6.3), 3.36 (1H, t, *J* 6.2), 3.49 (1H, d, *J* 11.4), 3.52 (1H, d, *J* 11.4), 3.92–3.99 (1H, m), 5.84 (1H, br s) and 7.17 (1H, br s).

***N*-Isopentyl  $\alpha$ -pantothenamide (*I3a*)**

$\delta_{\text{H}}$  (300 MHz; CDCl<sub>3</sub>; 25°C)  $\delta$  0.90 (6H, d, *J* 6.5), 0.97 (3H, s), 1.04 (3H, s), 1.38 (2H, dt, *J* 7.0, 7.7), 1.54–1.67 (1H, m), 3.25 (1H, t, *J* 5.8), 3.28 (1H, t, *J* 5.8), 3.52 (2H, s), 3.90 (1H, dd, *J* 5.9, 16.1), 3.97 (1H, dd, *J* 5.9, 16.1), 4.06 (1H, s), 6.24 (1H, br s) and 7.47 (1H, br s).

***N*-Isopentyl pantothenamide (*I3b*)**

$\delta_{\text{H}}$  (400 MHz; CDCl<sub>3</sub>; 25°C)  $\delta$  0.91 (6H, d, *J* 6.3), 0.92 (3H, s), 1.01 (3H, s), 1.38 (2H, dt, *J* 7.1, 7.6), 1.56–1.63 (1H, m), 2.42 (2H, t, *J* 5.9), 3.24 (1H, t, *J* 5.8), 3.26 (1H, t, *J* 5.8), 3.49 (2H, s), 3.53–3.60 (2H, m), 3.99 (1H, s), 5.88 (1H, br s) and 7.40 (1H, br s).

***N*-Isopentyl homopantothenamide (*I3c*)**

$\delta_{\text{H}}$  (300 MHz; CDCl<sub>3</sub>; 25°C)  $\delta$  0.90 (3H, s), 0.92 (3H, s), 0.93 (3H, s), 1.02 (3H, s), 1.34–1.43 (2H, m), 1.55–1.68 (1H, m), 1.81–1.90 (2H, m), 2.22 (2H, t, *J* 6.9), 3.24 (1H, t, *J* 5.9), 3.27 (1H, t, *J* 6.1), 3.33 (1H, t, *J* 6.1), 3.35 (1H, t, *J* 6.1), 3.50 (2H, s), 4.02 (1H, s), 6.12 (1H, br s) and 7.17 (1H, br s).

***N*-Cyclopentyl  $\alpha$ -pantothenamide (*I4a*)**

$\delta_{\text{H}}$  (300 MHz; CDCl<sub>3</sub>; 25°C)  $\delta$  0.97 (3H, s), 1.04 (3H, s), 1.33–1.44 (2H, m), 1.54–1.71 (4H, m), 1.91–2.02 (2H, m), 3.53 (2H, s), 3.87 (1H, dd, *J* 5.9, 16.1), 3.96 (1H, dd, *J* 5.9, 16.1), 4.06 (1H, s), 4.11–4.23 (1H, m), 6.25 (1H, br s) and 7.48 (1H, br s).

***N*-Cyclopentyl pantothenamide (*I4b*)**

$\delta_{\text{H}}$  (400 MHz; CDCl<sub>3</sub>; 25°C)  $\delta$  0.92 (3H, s), 1.01 (3H, s), 1.33–1.39 (2H, m), 1.57–1.62 (2H, m), 1.64–1.68 (2H, m), 1.94–1.99 (2H, m), 2.40 (2H, t, *J* 6.1), 3.49 (2H, s), 3.52–3.59 (2H, m), 3.99 (1H, s), 4.13–4.19 (1H, m), 5.89 (1H, br s) and 7.40 (1H, br s).



***N*-Cyclopentyl homopantothenamide (14c)**

$\delta_{\text{H}}$  (300 MHz; CDCl<sub>3</sub>; 25°C)  $\delta$  0.94 (3H, s), 1.03 (3H, s), 1.34–1.45 (2H, m), 1.55–1.71 (4H, m), 1.80–1.89 (2H, m), 1.92–2.03 (2H, m), 2.20 (2H, t, *J* 6.9), 3.24 (1H, t, *J* 6.2), 3.33 (1H, t, *J* 6.2), 3.35 (2H, s), 4.03 (1H, s), 4.12–4.23 (1H, m), 6.15 (1H, br s) and 7.18 (1H, br s).

***N*-Cyclohexyl  $\alpha$ -pantothenamide (15a)**

$\delta_{\text{H}}$  (300 MHz; CDCl<sub>3</sub>; 25°C)  $\delta$  0.98 (3H, s), 1.05 (3H, s), 1.11–1.42 (5H, m), 1.58–1.74 (3H, m), 1.87–1.92 (2H, m), 3.53 (2H, s), 3.69–3.79 (1H, m), 3.87 (1H, dd, *J* 5.9, 16.1), 3.98 (1H, dd, *J* 5.9, 16.1), 4.07 (1H, s), 6.05 (1H, br s) and 7.43 (1H, br s).

***N*-Cyclohexyl pantothenamide (15b)**

$\delta_{\text{H}}$  (400 MHz; CDCl<sub>3</sub>; 25°C)  $\delta$  0.92 (3H, s), 1.01 (3H, s), 1.10–1.18 (3H, m), 1.31–1.38 (2H, m), 1.60–1.63 (1H, m), 1.69–1.72 (2H, m), 1.87–1.89 (2H, m), 2.40 (2H, t, *J* 6.1), 3.49 (2H, s), 3.53–3.60 (2H, m), 3.70–3.80 (1H, m), 3.99 (1H, s), 5.72 (1H, br s) and 7.4 (1H, br s).

***N*-Cyclohexyl homopantothenamide (15c)**

$\delta_{\text{H}}$  (300 MHz; CDCl<sub>3</sub>; 25°C)  $\delta$  0.93 (3H, s), 1.03 (3H, s), 1.13–1.39 (7H, m), 1.56–1.64 (1H, m), 1.66–1.76 (2H, m), 1.80–1.92 (4H, m), 2.20 (2H, t, *J* 6.7), 3.33 (1H, t, *J* 6.4), 3.35 (1H, t, *J* 6.1), 3.48 (1H, d, *J* 11.9), 3.53 (1H, d, *J* 11.9), 3.70–3.80 (1H, m), 4.02 (1H, s), 5.99 (1H, br s) and 7.17 (1H, br s).

***N*-Cyclopropylmethyl  $\alpha$ -pantothenamide (16a)**

$\delta_{\text{H}}$  (300 MHz; CDCl<sub>3</sub>; 25°C)  $\delta$  0.16–0.28 (2H, m), 0.48–0.57 (2H, m), 0.87–0.98 (1H, m), 0.98 (3H, s), 1.05 (3H, s), 3.10 (1H, d, *J* 6.7), 3.12 (1H, d, *J* 5.9), 3.53 (2H, s), 3.92 (1H, dd, *J* 5.9, 16.1), 4.01 (1H, dd, *J* 5.9, 16.1), 4.07 (1H, s), 6.35 (1H, br s) and 7.47 (1H, br s).

***N*-Cyclopropylmethyl pantothenamide (16b)**

$\delta_{\text{H}}$  (400 MHz; CDCl<sub>3</sub>; 25°C)  $\delta$  0.17–0.22 (2H, m), 0.48–0.54 (2H, m), 0.90–0.95 (1H, m), 0.93 (3H, s), 1.01 (3H, s), 2.45 (2H, t, *J* 6.1), 3.09 (1H, d, *J* 5.4), 3.10 (1H, d, *J* 5.6), 3.49 (2H, s), 3.54–3.62 (2H, m), 3.99 (1H, s), 5.97 (1H, br s) and 7.38 (1H, br s).

***N*-Cyclopropylmethyl homopantothenamide (16c)**

$\delta_{\text{H}}$  (300 MHz; CDCl<sub>3</sub>; 25°C)  $\delta$  0.17–0.23 (2H, m), 0.47–0.54 (2H, m), 0.93 (3H, s), 0.90–0.95 (1H, m), 1.02 (3H, s), 1.82–1.91 (2H, m), 2.25 (2H, t, *J* 6.9), 3.09 (1H, d, *J* 7.0), 3.11 (1H, d, *J* 7.0), 3.34 (1H, t, *J* 6.1), 3.36 (1H, t, *J* 6.1), 3.50 (2H, s), 4.02 (1H, s), 6.22 (1H, br s) and 7.18 (1H, br s).

***N*-Cyclohexylmethyl  $\alpha$ -pantothenamide (17a)**

$\delta_{\text{H}}$  (300 MHz; CDCl<sub>3</sub>; 25°C)  $\delta$  0.83–0.97 (2H, m), 0.97 (3H, s), 1.05 (3H, s), 1.11–1.28 (3H, m), 1.38–1.50 (1H, m), 1.63–1.76 (5H, m), 3.08 (1H, d, *J* 6.5), 3.10 (1H, d, *J* 6.4), 3.53 (2H, s), 3.92 (1H, dd, *J* 5.9, 16.1), 3.98 (1H, dd, *J* 5.9, 16.1), 4.07 (1H, s), 6.29 (1H, br s) and 7.46 (1H, br s).

***N*-Cyclohexylmethyl pantothenamide (17b)**

$\delta_{\text{H}}$  (400 MHz; CDCl<sub>3</sub>; 25°C)  $\delta$  0.92 (3H, s), 1.01 (3H, s), 1.11–1.25 (4H, m), 1.40–1.47 (1H, m), 1.65–1.73 (6H, m), 2.44 (2H, t, *J* 5.9), 3.07 (1H, d, *J* 6.4), 3.09 (1H, d, *J* 6.1), 3.49 (2H, s), 3.53–3.61 (2H, m), 3.99 (1H, s), 5.90 (1H, br s) and 7.40 (1H, br s).

***N*-Cyclohexylmethyl homopantothenamide (17c)**

$\delta_{\text{H}}$  (300 MHz; CDCl<sub>3</sub>; 25°C)  $\delta$  0.93 (3H, s), 1.02 (3H, s), 1.12–1.27 (4H, m), 1.41–1.52 (1H, m), 1.62–1.73 (6H, m), 1.81–1.90 (2H, m), 2.23 (2H, t, *J* 6.7), 3.07 (1H, d, *J* 6.4), 3.09 (1H, d, *J* 6.5), 3.33 (1H, t, *J* 6.2), 3.36 (1H, t, *J* 6.2), 3.50 (2H, s), 4.02 (1H, s), 6.18 (1H, br s) and 7.17 (1H, br s).

***N*-Tetrahydrofurfuryl  $\alpha$ -pantothenamide (18a)**

$\delta_{\text{H}}$  (300 MHz; CDCl<sub>3</sub>; 25°C)  $\delta$  1.03 (3H, s), 1.10 (3H, s), 1.47–1.59 (1H, m), 1.85–2.05 (3H, m), 3.02–3.13 (1H, m), 3.54 (2H, s), 3.58–3.99 (5H, m), 4.00 (1H, s), 4.07–4.17 (1H, m), 6.77 (1H, br s) and 7.41 (1H, br s).

***N*-Tetrahydrofurfuryl pantothenamide (18b)**

$\delta_{\text{H}}$  (400 MHz; CDCl<sub>3</sub>; 25°C)  $\delta$  0.92 (3H, d, *J* 13.7), 1.03 (3H, s), 1.48–1.57 (3H, m), 1.87–1.96 (2H, m), 1.96–

2.04 (1H, m), 2.37–2.52 (2H, m), 2.94–3.16 (2H, m), 3.48 (1H, s), 3.57–3.64 (4H, m), 3.73–3.79 (1H, m), 3.80–3.88 (1H, m), 3.97 (1H, s), 3.98–4.06 (1H, m), 6.15 (1H, br s) and 7.34 (1H, br s).

***N*-Tetrahydrofurfuryl homopantothenamide (18c)**

$\delta_{\text{H}}$  (300 MHz;  $\text{CDCl}_3$ ; 25°C)  $\delta$  0.92 (3H, s), 1.03 (3H, s), 1.47–1.58 (1H, m), 1.83–1.94 (4H, m), 1.93–2.04 (1H, m), 2.26 (2H, t, *J* 7.2), 3.05–3.20 (1H, m), 3.28–3.42 (2H, m), 3.47 (1H, d, *J* 12.4), 3.51 (1H, d, *J* 12.4), 3.52–3.60 (1H, m), 3.72–3.79 (1H, m), 3.82–3.92 (2H, m), 4.00 (1H, s), 6.25 (1H, br s) and 7.16 (1H, br s).

***N*-(2-Methoxy-ethyl)  $\alpha$ -pantothenamide (19a)**

$\delta_{\text{H}}$  (300 MHz;  $\text{CDCl}_3$ ; 25°C)  $\delta$  1.00 (3H, s), 1.07 (3H, s), 3.35 (3H, s), 3.44–3.49 (4H, m), 3.53 (2H, s), 3.90 (1H, dd, *J* 5.9, 16.4), 4.05 (1H, dd, *J* 5.9, 16.4), 4.03 (1H, s), 6.74 (1H, br s) and 7.45 (1H, br s).

***N*-(2-Methoxy-ethyl) pantothenamide (19b)**

$\delta_{\text{H}}$  (400 MHz;  $\text{CDCl}_3$ ; 25°C)  $\delta$  0.92 (3H, s), 1.02 (3H, s), 2.45 (2H, t, *J* 6.3), 3.36 (3H, s), 3.39–3.47 (6H, m), 3.48 (2H, s), 3.56–3.60 (2H, m), 3.98 (1H, s), 6.13 (1H, br s) and 7.34 (1H, br s).

***N*-(2-Methoxy-ethyl) homopantothenamide (19c)**

$\delta_{\text{H}}$  (300 MHz;  $\text{CDCl}_3$ ; 25°C)  $\delta$  0.93 (3H, s), 1.03 (3H, s), 1.83–1.92 (2H, m), 2.26 (2H, t, *J* 6.6), 3.29–3.40 (2H, m), 3.36 (3H, s), 3.42–3.48 (4H, m), 3.48 (1H, d, *J* 11.2), 3.51 (1H, d, *J* 11.2), 4.01 (1H, s), 6.27 (1H, br s) and 7.15 (1H, br s).

***N*-(2-(Ethylthio)-ethyl)  $\alpha$ -pantothenamide (20a)**

$\delta_{\text{H}}$  (300 MHz;  $\text{CDCl}_3$ ; 25°C)  $\delta$  0.98 (3H, s), 1.05 (3H, s), 1.26 (3H, t, *J* 7.3), 2.55 (2H, q, *J* 7.3), 2.67 (2H, t, *J* 6.5), 3.44 (1H, t, *J* 6.2), 3.46 (1H, t, *J* 6.5), 3.53 (2H, s), 3.94 (1H, dd, *J* 5.9, 16.4), 4.01 (1H, dd, *J* 5.9, 16.4), 4.06 (1H, s), 6.73 (1H, br s) and 7.47 (1H, br s).

***N*-(2-(Ethylthio)-ethyl) pantothenamide (20b)**

$\delta_{\text{H}}$  (400 MHz;  $\text{CDCl}_3$ ; 25°C)  $\delta$  0.92 (3H, s), 1.02 (3H, s), 1.26 (3H, t, *J* 7.5), 2.45 (2H, t, *J* 6.3), 2.55 (2H, q, *J* 7.5), 2.67 (2H, t, *J* 6.5), 3.41–3.49 (2H, m), 3.49 (2H, s), 3.55–3.60 (2H, m), 4.00 (1H, s), 6.23 (1H, br s) and 7.35 (1H, br s).

***N*-(2-(Ethylthio)-ethyl) homopantothenamide (20c)**

$\delta_{\text{H}}$  (300 MHz;  $\text{CDCl}_3$ ; 25°C)  $\delta$  0.93 (3H, s), 1.02 (3H, s), 1.26 (3H, t, *J* 7.3), 1.82–1.91 (2H, m), 2.25 (2H, t, *J* 6.9), 2.56 (2H, q, *J* 7.3), 2.68 (2H, t, *J* 6.5), 3.34 (1H, t, *J* 6.2), 3.37 (1H, t, *J* 6.4), 3.43 (1H, t, *J* 6.4), 3.45 (1H, t, *J* 6.5), 3.49 (1H, d, *J* 11.6), 3.52 (1H, d, *J* 11.6), 4.02 (1H, s), 6.47 (1H, br s) and 7.14 (1H, br s).

***N*-(3-Methoxy-propyl)  $\alpha$ -pantothenamide (21a)**

$\delta_{\text{H}}$  (300 MHz;  $\text{CDCl}_3$ ; 25°C)  $\delta$  0.98 (3H, s), 1.05 (3H, s), 1.77 (2H, q, *J* 5.9), 3.34 (3H, s), 3.35 (2H, t, *J* 6.2), 3.37 (2H, t, *J* 6.2), 3.47 (2H, t, *J* 5.9), 3.49 (1H, d, *J* 11.2), 3.55 (1H, d, *J* 11.2), 3.91 (1H, dd, *J* 5.9, 16.3), 3.97 (1H, dd, *J* 5.9, 16.3), 4.04 (1H, s), 6.72 (1H, br s) and 7.42 (1H, br s).

***N*-(3-Methoxy-propyl) pantothenamide (21b)**

$\delta_{\text{H}}$  (400 MHz;  $\text{CDCl}_3$ ; 25°C)  $\delta$  0.92 (3H, s), 1.02 (3H, s), 1.76 (2H, q, *J* 6.0), 2.41 (2H, t, *J* 6.1), 3.29–3.39 (2H, m), 3.34 (3H, s), 3.47 (2H, t, *J* 6.0), 3.48 (2H, s), 3.57 (2H, q, *J* 6.6), 3.98 (1H, s), 6.35 (1H, br s) and 7.39 (1H, br s).

***N*-(3-Methoxy-propyl) homopantothenamide (21c)**

$\delta_{\text{H}}$  (300 MHz;  $\text{CDCl}_3$ ; 25°C)  $\delta$  0.93 (3H, s), 1.02 (3H, s), 1.73–1.81 (2H, m), 1.81–1.90 (2H, m), 2.22 (2H, t, *J* 6.9), 3.31–3.38 (4H, m), 3.34 (3H, s), 3.47 (2H, t, *J* 5.9), 3.50 (2H, s), 4.01 (1H, s), 6.49 (1H, br s) and 7.20 (1H, br s).

***N*-(3-(Methylthio)-propyl)  $\alpha$ -pantothenamide (22a)**

$\delta_{\text{H}}$  (300 MHz;  $\text{CDCl}_3$ ; 25°C)  $\delta$  0.98 (3H, s), 1.06 (3H, s), 1.82 (2H, q, *J* 7.0), 2.10 (3H, s), 2.53 (2H, t, *J* 7.0), 3.36 (1H, t, *J* 6.8), 3.38 (1H, t, *J* 6.5), 3.51 (1H, d, *J* 11.2), 3.57 (1H, d, *J* 11.2), 3.93 (1H, dd, *J* 5.9, 16.3), 3.98 (1H, dd, *J* 5.9, 16.3), 4.06 (1H, s), 6.62 (1H, br s) and 7.50 (1H, br s).

***N*-(3-(Methylthio)-propyl) pantothenamide (22b)**

This journal is (c) The Royal Society of Chemistry 2008

$\delta_{\text{H}}$  (400 MHz;  $\text{CDCl}_3$ ; 25°C)  $\delta$  0.92 (3H, s), 1.01 (3H, s), 1.80 (2H, q,  $J$  7.0), 2.10 (3H, s), 2.44 (2H, t,  $J$  6.0), 2.52 (2H, t,  $J$  7.0), 3.31–3.38 (2H, m), 3.49 (2H, s), 3.54–3.60 (2H, m), 3.99 (1H, s), 6.19 (1H, br s) and 7.38 (1H, br s).

***N*-3-(Methylthio)-propyl homopantothenamide (22c)**

$\delta_{\text{H}}$  (300 MHz;  $\text{CDCl}_3$ ; 25°C)  $\delta$  0.93 (3H, s), 1.02 (3H, s), 1.77–1.90 (4H, m), 2.10 (3H, s), 2.23 (2H, t,  $J$  6.9), 2.54 (2H, t,  $J$  7.0), 3.31–3.39 (4H, m), 3.51 (2H, s), 4.02 (1H, s), 6.47 (1H, br s) and 7.16 (1H, br s).

***N*-(3-Isopropoxypropyl)  $\alpha$ -pantothenamide (23a)**

$\delta_{\text{H}}$  (300 MHz; CDCl<sub>3</sub>; 25°C)  $\delta$  0.98 (3H, s), 1.06 (3H, s), 1.15 (3H, s), 1.17 (3H, s), 1.75 (2H, q, *J* 6.0), 3.36 (1H, t, *J* 5.9), 3.38 (1H, t, *J* 5.8), 3.48–3.56 (2H, m), 3.51 (2H, s), 3.57 (1H, t, *J* 6.0), 3.90 (1H, dd, *J* 5.9, 16.4), 3.96 (1H, dd, *J* 5.9, 16.4), 4.04 (1H, s), 6.80 (1H, br s) and 7.41 (1H, br s).

***N*-(3-Isopropoxypropyl) pantothenamide (23b)**

$\delta_{\text{H}}$  (400 MHz; CDCl<sub>3</sub>; 25°C)  $\delta$  0.92 (3H, s), 1.02 (3H, s), 1.15 (3H, s), 1.17 (3H, s), 1.75 (2H, q, *J* 5.7), 2.39 (2H, t, *J* 5.9), 3.30–3.40 (2H, m), 3.48 (2H, s), 3.52 (2H, t, *J* 5.9), 3.54–3.58 (3H, m), 3.99 (1H, s), 6.52 (1H, br s) and 7.40 (1H, br s).

***N*-(3-Isopropoxypropyl) homopantothenamide (23c)**

$\delta_{\text{H}}$  (300 MHz; CDCl<sub>3</sub>; 25°C)  $\delta$  0.93 (3H, s), 1.02 (3H, s), 1.15 (3H, s), 1.17 (3H, s), 1.75 (2H, q, *J* 6.0), 1.82–1.91 (2H, m), 2.22 (2H, t, *J* 6.7), 3.31–3.38 (4H, m), 3.50 (2H, s), 3.50–3.60 (3H, m), 4.00 (1H, s), 6.63 (1H, br s) and 7.20 (1H, br s).

***N*-(2-Hydroxy-ethyl)  $\alpha$ -pantothenamide (24a)**

$\delta_{\text{H}}$  (300 MHz; D<sub>2</sub>O; 25°C)  $\delta$  0.97 (6H, s), 3.37 (2H, t, *J* 5.6), 3.48 (1H, d, *J* 11.4), 3.52 (1H, d, *J* 11.4), 3.60 (2H, t, *J* 5.6), 3.97 (2H, s) and 4.06 (1H, s).

***N*-(2-Hydroxy-ethyl) pantothenamide (24b) (also known as Oxypantetheine)**

$\delta_{\text{H}}$  (400 MHz; D<sub>2</sub>O; 25°C)  $\delta$  0.89 (3H, s), 0.93 (3H, s), 2.53 (2H, t, *J* 6.3), 3.33 (2H, t, *J* 5.5), 3.40 (1H, d, *J* 11.2), 3.52 (1H, d, *J* 10.3), 3.49–3.57 (2H, m), 3.66 (2H, t, *J* 5.5) and 3.99 (1H, s).

***N*-(2-Hydroxy-ethyl) homopantothenamide (24c)**

$\delta_{\text{H}}$  (300 MHz; D<sub>2</sub>O; 25°C)  $\delta$  0.91 (3H, s), 0.95 (3H, s), 1.78–1.88 (2H, m), 2.32 (2H, t, *J* 7.5), 3.27 (2H, t, *J* 6.9), 3.34 (2H, t, *J* 5.6), 3.41 (1H, d, *J* 11.2), 3.53 (1H, d, *J* 11.2), 3.67 (2H, t, *J* 5.6) and 4.00 (1H, s).

***N*-(1-Hydroxymethyl-propyl)  $\alpha$ -pantothenamide (25a)**

$\delta_{\text{H}}$  (300 MHz; D<sub>2</sub>O; 25°C)  $\delta$  0.89 (3H, t, *J* 7.5), 0.96 (3H, s), 0.97 (3H, s), 1.33–1.48 (1H, m), 1.54–1.69 (1H, m), 3.43–3.55 (2H, m), 3.51–3.66 (2H, m), 3.79–3.87 (1H, m), 3.97 (2H, s) and 4.06 (1H, s).

***N*-(1-Hydroxymethyl-propyl) pantothenamide (25b)**

$\delta_{\text{H}}$  (400 MHz; D<sub>2</sub>O; 25°C)  $\delta$  0.89 (3H, t, *J* 7.5), 0.90 (3H, s), 0.93 (3H, s), 1.36–1.44 (1H, m), 1.55–1.63 (1H, m), 2.54 (2H, t, *J* 6.3), 3.40 (1H, d, *J* 11.1), 3.52 (1H, d, *J* 11.1), 3.52–3.55 (4H, m), 3.61 (1H, dd, *J* 4.7, 10.1), 3.77–3.82 (1H, m) and 3.99 (1H, s).

***N*-(1-Hydroxymethyl-propyl) homopantothenamide (25c)**

$\delta_{\text{H}}$  (300 MHz; D<sub>2</sub>O; 25°C)  $\delta$  0.90 (3H, t, *J* 7.6), 0.92 (3H, s), 0.95 (3H, s), 1.54–1.73 (2H, m), 1.66–1.75 (2H, m), 2.33 (2H, t, *J* 7.5), 3.13 (2H, t, *J* 6.9), 3.27 (1H, d, *J* 11.2), 3.38 (1H, d, *J* 11.2), 3.35–3.52 (5H, m), 3.75–3.82 (1H, m) and 4.00 (1H, s).

***N*-(3-Hydroxy-propyl)  $\alpha$ -pantothenamide (26a)**

$\delta_{\text{H}}$  (300 MHz; D<sub>2</sub>O; 25°C)  $\delta$  0.95 (6H, s), 1.76 (2H, q, *J* 6.7), 3.30 (2H, t, *J* 6.7), 3.46 (1H, d, *J* 11.2), 3.52 (1H, d, *J* 11.2), 3.63 (2H, t, *J* 6.7), 3.93 (2H, s) and 4.05 (1H, s).

***N*-(3-Hydroxy-propyl) pantothenamide (26b)**

$\delta_{\text{H}}$  (400 MHz; D<sub>2</sub>O; 25°C)  $\delta$  0.89 (3H, s), 0.93 (3H, s), 1.75 (2H, q, *J* 6.6), 2.50 (2H, t, *J* 6.3), 3.25 (2H, t, *J* 7.1), 3.40 (2H, d, *J* 11.2), 3.52 (2H, d, *J* 11.7), 3.47–3.56 (2H, m), 3.63 (2H, t, *J* 6.6) and 3.99 (1H, s).

***N*-(3-Hydroxy-propyl) homopantothenamide (26c)**

$\delta_{\text{H}}$  (300 MHz; D<sub>2</sub>O; 25°C)  $\delta$  0.91 (3H, s), 0.95 (3H, s), 1.71–1.80 (2H, m), 1.78–1.87 (2H, m), 2.29 (2H, t, *J* 7.5), 3.26 (2H, t, *J* 7.0), 3.41 (1H, d, *J* 11.2), 3.53 (1H, d, *J* 11.2), 3.64 (2H, t, *J* 6.5) and 4.00 (1H, s).

***N*-(2,3-Dihydroxy-propyl)  $\alpha$ -pantothenamide (27a)**

$\delta_{\text{H}}$  (300 MHz; D<sub>2</sub>O; 25°C)  $\delta$  0.96 (6H, s), 3.26 (1H, dd, *J* 7.0, 13.8), 3.38 (1H, dd, *J* 7.0, 13.8), 3.45 (1H, d, *J* 11.3), 3.52 (1H, d, *J* 11.3), 3.54 (1H, dd, *J* 4.1, 11.7), 3.62 (1H, dd, *J* 4.1, 11.7), 3.78–3.87 (1H, m), 3.97 (2H, s) and 4.06 (1H, s).

***N*-(2,3-Dihydroxy-propyl) pantothenamide (27b)**

$\delta_{\text{H}}$  (400 MHz; D<sub>2</sub>O; 25°C)  $\delta$  0.89 (3H, s), 0.93 (3H, s), 2.53 (2H, t, *J* 6.6), 3.22 (1H, dd, *J* 7.2, 14.1), 3.35 (1H, dd, *J* 7.2, 14.1), 3.41 (1H, d, *J* 11.2), 3.52 (1H, d, *J* 11.2), 3.49–3.66 (3H, m), 3.61 (1H, dd, *J* 3.9, 11.7), 3.78–3.83 (1H, m) and 3.99 (1H, s).

***N*-(2,3-Dihydroxy-propyl) homopantothenamide (27c)**

$\delta_{\text{H}}$  (300 MHz; D<sub>2</sub>O; 25°C)  $\delta$  0.91 (3H, s), 0.95 (3H, s), 1.79–1.88 (2H, m), 2.33 (2H, t, *J* 7.6), 3.17–3.35 (4H, m), 3.42 (1H, d, *J* 11.2), 3.53 (1H, d, *J* 11.2), 3.49–3.66 (2H, m), 3.78–3.86 (1H, m) and 4.00 (1H, s).

***N*-(5-Azido-pentyl)  $\alpha$ -pantothenamide (28a)**

$\delta_{\text{H}}$  (300 MHz; CDCl<sub>3</sub>; 25°C)  $\delta$  0.97 (3H, s), 1.03 (3H, s), 1.36–1.55 (4H, m), 1.53–1.65 (2H, m), 3.20–3.34 (4H, m), 3.52 (2H, s), 3.94 (2H, d, *J* 5.9), 4.06 (1H, s), 6.55 (1H, br s) and 7.53 (1H, br s).

***N*-(5-Azido-pentyl) pantothenamide (28b)**

$\delta_{\text{H}}$  (400 MHz; CDCl<sub>3</sub>; 25°C)  $\delta$  0.93 (3H, s), 1.00 (3H, s), 1.37–1.44 (2H, m), 1.49–1.57 (2H, m), 1.58–1.65 (2H, m), 2.44 (2H, t, *J* 6.0), 3.21–3.30 (4H, m), 3.49 (2H, s), 3.54–3.59 (2H, m), 4.00 (1H, s), 6.07 (1H, br s) and 7.39 (1H, br s).

***N*-(5-Azido-pentyl) homopantothenamide (28c)**

$\delta_{\text{H}}$  (300 MHz; CDCl<sub>3</sub>; 25°C)  $\delta$  0.94 (3H, s), 1.01 (3H, s), 1.38–1.46 (2H, m), 1.50–1.67 (4H, m), 1.81–1.90 (2H, m), 2.23 (2H, t, *J* 6.7), 3.22–3.30 (4H, m), 3.33 (1H, t, *J* 5.9), 3.35 (1H, t, *J* 6.5), 3.50 (2H, s), 4.03 (1H, s), 6.39 (1H, br s) and 7.18 (1H, br s).

***N*-(2-Acetylamino-ethyl)  $\alpha$ -pantothenamide (29a)**

$\delta_{\text{H}}$  (300 MHz; CDCl<sub>3</sub>; 25°C)  $\delta$  0.96 (6H, s), 1.99 (3H, s), 3.28–3.37 (4H, m), 3.46 (1H, d, *J* 11.2), 3.52 (1H, d, *J* 11.2), 3.93 (2H, s) and 4.06 (1H, s).

***N*-(2-Acetylamino-ethyl) pantothenamide (29b)**

$\delta_{\text{H}}$  (400 MHz; D<sub>2</sub>O; 25°C)  $\delta$  0.89 (3H, s), 0.93 (3H, s), 1.99 (3H, s), 2.49 (2H, t, *J* 6.6), 3.30 (4H, s), 3.40 (1H, d, *J* 11.2), 3.51 (1H, d, *J* 11.2), 3.46–3.55 (2H, m) and 3.99 (1H, s).

***N*-(2-Acetylamino-ethyl) homopantothenamide (29c)**

$\delta_{\text{H}}$  (300 MHz; D<sub>2</sub>O; 25°C)  $\delta$  0.91 (3H, s), 0.95 (3H, s), 1.76–1.86 (2H, m), 1.98 (3H, s), 2.82 (2H, t, *J* 7.5), 3.26 (2H, t, *J* 6.9), 3.32 (4H, s), 3.41 (1H, d, *J* 11.4), 3.52 (1H, d, *J* 11.2) and 3.72 (1H, s).

***N*-(6-Boc-amino-hexyl)  $\alpha$ -pantothenamide (30a)**

$\delta_{\text{H}}$  (300 MHz; CDCl<sub>3</sub>; 25°C)  $\delta$  0.98 (3H, s), 1.05 (3H, s), 1.29–1.34 (4H, m), 1.43 (9H, s), 1.43–1.52 (4H, m), 3.07 (1H, t, *J* 6.4), 3.10 (1H, t, *J* 6.8), 3.18–3.35 (2H, m), 3.52 (2H, s), 3.91 (1H, dd, *J* 5.9, 16.4), 4.00 (1H, dd, *J* 5.9, 16.4), 4.06 (1H, s), 4.63 (1H, br s), 6.55 (1H, br s) and 7.48 (1H, br s).

***N*-(6-Boc-amino-hexyl) pantothenamide (30b)**

$\delta_{\text{H}}$  (400 MHz; CDCl<sub>3</sub>; 25°C)  $\delta$  0.93 (3H, s), 1.01 (3H, s), 1.32–1.33 (4H, m), 1.43 (9H, s), 1.46–1.50 (4H, m), 2.43 (2H, td, *J* 6.0, 2.4), 3.07–3.10 (2H, m), 3.17–3.23 (1H, m), 3.24–3.30 (1H, m), 3.49 (2H, s), 3.57 (2H, q, *J* 6.0), 4.00 (1H, s), 4.63 (1H, br s), 6.13 (1H, br s) and 7.40 (1H, br s).

***N*-(6-Boc-amino-hexyl) homopantothenamide (30c)**

$\delta_{\text{H}}$  (300 MHz; CDCl<sub>3</sub>; 25°C)  $\delta$  0.93 (3H, s), 1.03 (3H, s), 1.30–1.36 (4H, m), 1.43 (9H, s), 1.46–1.53 (4H, m), 1.82–1.91 (2H, m), 2.24 (2H, t, *J* 6.7), 3.06–3.12 (2H, m), 3.22 (1H, t, *J* 6.5), 3.24 (1H, t, *J* 5.9), 3.36 (1H, t, *J* 6.2), 3.37 (1H, t, *J* 6.2), 3.50 (2H, s), 4.02 (1H, s), 4.61 (1H, br s), 6.35 (1H, br s) and 7.18 (1H, br s).

***N*-Phenethyl  $\alpha$ -pantothenamide (31a)**

$\delta_{\text{H}}$  (300 MHz; CDCl<sub>3</sub>; 25°C)  $\delta$  0.94 (3H, s), 1.02 (3H, s), 2.81 (2H, t, *J* 6.9), 3.44 (1H, d, *J* 11.2), 3.49 (1H, d, *J* 11.2), 3.51 (1H, t, *J* 4.5), 3.53 (1H, t, *J* 6.5), 3.87 (1H, dd, *J* 5.9, 16.4), 3.94 (1H, dd, *J* 5.9, 16.4), 4.01 (1H, s), 6.28 (1H, br s), 7.17–7.34 (5H, m) and 7.37 (1H, br s).

***N*-Phenethyl pantothenamide (31b)**

$\delta_{\text{H}}$  (400 MHz;  $\text{CDCl}_3$ ; 25°C)  $\delta$  0.92 (3H, s), 1.01 (3H, s), 2.38 (2H, t,  $J$  6.1), 2.81 (2H, t,  $J$  6.8), 3.48 (2H, s), 3.46–3.58 (4H, m), 3.97 (1H, s), 5.86 (1H, br s), 7.18 (2H, d,  $J$  6.8), 7.23 (1H, t,  $J$  7.6), 7.31 (2H, t,  $J$  7.3) and 7.34 (1H, br s).

***N*-Phenethyl homopantothenamide (31c)**

$\delta_{\text{H}}$  (300 MHz;  $\text{CDCl}_3$ ; 25°C)  $\delta$  0.93 (s, 3H), 1.03 (s, 3H), 1.78–1.87 (2H, m), 2.19 (2H, t,  $J$  6.7), 2.83 (2H, t,  $J$  7.0), 3.22 (1H, t,  $J$  6.5), 3.28 (1H, t,  $J$  6.5), 3.46–3.54 (4H, m), 4.01 (1H, s), 6.06 (1H, br s), 7.09 (1H, br s), 7.18–7.34 (5H, m).

***N*-Benzyl  $\alpha$ -pantothenamide (32a)**

$\delta_{\text{H}}$  (300 MHz;  $\text{CDCl}_3$ ; 25°C)  $\delta$  0.93 (3H, s), 1.00 (3H, s), 3.44 (1H, d,  $J$  11.2), 3.49 (1H, d,  $J$  11.2), 3.93 (1H, dd,  $J$  5.9, 16.4), 4.00 (1H, dd,  $J$  5.9, 16.4), 4.03 (1H, s), 4.41 (2H, d,  $J$  5.9), 6.69 (1H, br s), 7.23–7.35 (5H, m) and 7.45 (1H, br s).

***N*-Benzyl pantothenamide (32b)**

$\delta_{\text{H}}$  (400 MHz;  $\text{CDCl}_3$ ; 25°C)  $\delta$  0.90 (3H, s), 0.99 (3H, s), 2.47 (2H, t,  $J$  6.1), 3.45 (2H, s), 3.54–3.61 (2H, m), 3.96 (1H, s), 4.40 (2H, d,  $J$  5.7), 6.28 (1H, br s), 7.25 (2H, d,  $J$  7.3), 7.27 (1H, t,  $J$  7.3), 7.33 (2H, t,  $J$  7.3) and 7.37 (1H, br s).

***N*-Benzyl homopantothenamide (32c)**

$\delta_{\text{H}}$  (300 MHz;  $\text{CDCl}_3$ ; 25°C)  $\delta$  0.92 (3H, s), 1.01 (3H, s), 1.84–1.93 (2H, m), 2.28 (2H, t,  $J$  6.9), 3.33 (1H, td,  $J$  6.2, 1.8), 3.35 (1H, td,  $J$  6.2, 1.8), 3.49 (2H, s), 3.99 (1H, s), 4.43 (2H, d,  $J$  5.6), 6.52 (1H, br s), 7.16 (1H, br s) and 7.28–7.37 (5H, m).

***N*-(4-Methoxy-benzyl)  $\alpha$ -pantothenamide (33a)**

$\delta_{\text{H}}$  (300 MHz;  $\text{CDCl}_3$ ; 25°C)  $\delta$  0.93 (3H, s), 1.01 (3H, s), 3.44 (1H, d,  $J$  11.2), 3.50 (1H, d,  $J$  11.2), 3.78 (3H, s), 3.94 (2H, t,  $J$  5.5), 3.95 (2H, t,  $J$  4.9), 4.02 (1H, s), 4.33 (2H, d,  $J$  5.9), 6.59 (1H, br s), 6.83 (2H, d,  $J$  8.8), 7.17 (2H, d,  $J$  8.8) and 7.44 (1H, br s).

***N*-(4-Methoxy-benzyl) pantothenamide (33b)**

$\delta_{\text{H}}$  (400 MHz;  $\text{CDCl}_3$ ; 25°C)  $\delta$  0.89 (3H, s), 0.99 (3H, s), 2.44 (2H, t,  $J$  5.9), 3.46 (2H, s), 3.53–3.60 (2H, m), 3.79 (3H, s), 3.96 (1H, s), 4.34 (2H, d,  $J$  5.6), 6.19 (1H, br s), 6.85 (2H, d,  $J$  8.8), 7.18 (2H, d,  $J$  8.8) and 7.37 (1H, br s).

***N*-(4-Methoxy-benzyl) homopantothenamide (33c)**

$\delta_{\text{H}}$  (300 MHz;  $\text{CDCl}_3$ ; 25°C)  $\delta$  0.91 (3H, s), 1.04 (3H, s), 1.82–1.92 (2H, m), 2.25 (2H, t,  $J$  6.9), 3.33 (1H, td,  $J$  6.4, 2.9), 3.35 (1H, td,  $J$  6.4, 2.9), 3.48 (2H, s), 3.79 (3H, s), 3.98 (1H, s), 4.34 (2H, d,  $J$  5.6), 6.36 (1H, br s), 6.85 (2H, d,  $J$  8.5), 7.13 (1H, br s) and 7.20 (2H, d,  $J$  8.8).

***N*-(3-Methoxy-benzyl)  $\alpha$ -pantothenamide (34a)**

$\delta_{\text{H}}$  (300 MHz;  $\text{CDCl}_3$ ; 25°C)  $\delta$  0.93 (3H, s), 1.00 (3H, s), 3.45 (1H, d,  $J$  11.2), 3.48 (1H, d,  $J$  11.2), 3.78 (3H, s), 3.95 (1H, d,  $J$  5.9), 3.97 (1H, d,  $J$  5.9), 4.02 (1H, s), 4.37 (2H, d,  $J$  5.9), 6.74 (1H, br s), 6.79–6.84 (3H, m), 7.20–7.25 (1H, m) and 7.47 (1H, br s).

***N*-(3-Methoxy-benzyl) pantothenamide (34b)**

$\delta_{\text{H}}$  (400 MHz;  $\text{CDCl}_3$ ; 25°C)  $\delta$  0.89 (3H, s), 1.00 (3H, s), 2.43–2.53 (2H, m), 3.44 (1H, d,  $J$  11.5), 3.48 (1H, d,  $J$  11.5), 3.59 (2H, q,  $J$  5.5), 3.80 (3H, s), 3.96 (1H, s), 4.32 (1H, dd,  $J$  5.6, 14.6), 4.46 (1H, dd,  $J$  5.8, 14.9), 6.27 (1H, br s), 6.79 (1H, s), 6.80 (1H, d,  $J$  7.8), 6.84 (1H, d,  $J$  7.8), 7.24 (1H, t,  $J$  7.8) and 7.39 (1H, br s).

***N*-(3-Methoxy-benzyl) homopantothenamide (34c)**

$\delta_{\text{H}}$  (300 MHz;  $\text{CDCl}_3$ ; 25°C)  $\delta$  0.91 (3H, s), 1.00 (3H, s), 1.83–1.93 (2H, m), 2.28 (2H, t,  $J$  6.9), 3.30–3.38 (2H, m), 3.48 (2H, s), 3.79 (3H, s), 3.98 (1H, s), 4.39 (2H, d,  $J$  5.9), 6.48 (1H, br s), 6.79–6.87 (3H, m), 7.14 (1H, br s) and 7.23 (1H, dd,  $J$  7.6, 1.2).

***N*-(3,4,5-Trimethoxy-benzyl)  $\alpha$ -pantothenamide (35a)**

$\delta_{\text{H}}$  (300 MHz;  $\text{CDCl}_3$ ; 25°C)  $\delta$  0.93 (3H, s), 1.00 (3H, s), 3.45 (1H, d,  $J$  11.2), 3.50 (1H, d,  $J$  11.2), 3.81 (3H, s), 3.84 (6H, s), 3.91–3.97 (2H, m), 4.02 (1H, s), 4.34 (2H, d,  $J$  5.6), 6.48 (2H, s), 6.73 (1H, br s) and 7.43

(1H, br s).

***N*-(3,4,5-Trimethoxy-benzyl) pantothenamide (35b)**

$\delta_{\text{H}}$  (400 MHz;  $\text{CDCl}_3$ ; 25°C)  $\delta$  0.89 (3H, s), 0.98 (3H, s), 2.47 (2H, t,  $J$  5.4), 3.46 (2H, s), 3.55–3.62 (2H, m), 3.81 (3H, s), 3.84 (6H, s), 3.95 (1H, s), 4.30–4.36 (2H, m), 6.32 (1H, br s), 6.49 (2H, s) and 7.36 (1H, br s).

***N*-(3,4,5-Trimethoxy-benzyl) homopantothenamide (35c)**

$\delta_{\text{H}}$  (300 MHz;  $\text{CDCl}_3$ ; 25°C)  $\delta$  0.91 (3H, s), 1.00 (3H, s), 1.83–1.93 (2H, m), 2.27 (2H, t,  $J$  6.9), 3.33 (1H, td,  $J$  6.2, 1.2), 3.35 (1H, td,  $J$  6.2, 1.2), 3.49 (2H, s), 3.82 (3H, s), 3.84 (3H, s), 3.99 (1H, s), 4.35 (2H, d,  $J$  5.9), 6.52 (2H, s), 6.60 (1H, br s) and 7.12 (1H, br s).

***N*-Piperonyl  $\alpha$ -pantothenamide (36a)**

$\delta_{\text{H}}$  (300 MHz;  $\text{CDCl}_3$ ; 25°C)  $\delta$  0.93 (3H, s), 1.01 (3H, s), 3.46 (1H, d,  $J$  11.2), 3.51 (1H, d,  $J$  11.2), 3.93 (1H, d,  $J$  5.9, 16.3), 3.99 (1H, d,  $J$  5.9, 16.3), 4.03 (1H, s), 4.28 (1H, dd,  $J$  5.8, 14.7), 4.32 (1H, dd,  $J$  5.8, 14.7), 5.93 (2H, s), 6.68 (1H, br s), 6.69–6.75 (3H, m) and 7.47 (1H, br s).

***N*-Piperonyl pantothenamide (36b)**

$\delta_{\text{H}}$  (400 MHz;  $\text{CDCl}_3$ ; 25°C)  $\delta$  0.90 (3H, s), 0.99 (3H, s), 2.46 (2H, t,  $J$  5.4), 3.47 (2H, s), 3.66–3.61 (2H, m), 3.97 (1H, s), 4.28 (1H, dd,  $J$  5.6, 14.2), 4.33 (1H, dd,  $J$  5.6, 14.2), 5.94 (2H, s), 6.24 (1H, br s), 6.70–6.75 (3H, m) and 7.37 (1H, br s).

***N*-Piperonyl homopantothenamide (36c)**

$\delta_{\text{H}}$  (300 MHz;  $\text{CDCl}_3$ ; 25°C)  $\delta$  0.92 (3H, s), 1.01 (3H, s), 1.83–1.92 (2H, m), 2.26 (2H, t,  $J$  6.9), 3.33 (1H, td,  $J$  6.2, 2.3), 3.35 (1H, td,  $J$  6.2, 2.3), 3.49 (2H, s), 3.99 (1H, s), 4.32 (2H, d,  $J$  5.6), 5.94 (2H, s), 6.44 (1H, br s), 6.74 (2H, s), 6.78 (1H, s) and 7.12 (1H, br s).

***N*-(4-Trifluoromethoxy-benzyl)  $\alpha$ -pantothenamide (37a)**

$\delta_{\text{H}}$  (300 MHz;  $\text{CDCl}_3$ ; 25°C)  $\delta$  0.93 (3H, s), 1.00 (3H, s), 3.46 (1H, d,  $J$  11.2), 3.51 (1H, d,  $J$  11.2), 3.94 (1H, dd,  $J$  5.9, 16.4), 4.03 (1H, dd,  $J$  5.9, 16.4), 4.04 (1H, s), 4.39 (1H, dd,  $J$  5.8, 14.8), 4.44 (1H, dd,  $J$  5.8, 14.8), 6.83 (1H, br s), 7.15–7.40 (4H, m) and 7.46 (1H, br s).

***N*-(4-Trifluoromethoxy-benzyl) pantothenamide (37b)**

$\delta_{\text{H}}$  (400 MHz;  $\text{CDCl}_3$ ; 25°C)  $\delta$  0.89 (3H, s), 0.98 (3H, s), 2.49 (2H, t,  $J$  5.9), 3.46 (1H, d,  $J$  11.2), 3.49 (1H, d,  $J$  11.2), 3.55–3.67 (2H, m), 3.97 (1H, s), 4.41 (2H, d,  $J$  6.3), 3.82 (1H, br s), 7.17 (2H, d,  $J$  8.7), 7.29 (2H, d,  $J$  8.7) and 7.33 (1H, br s).

***N*-(4-Trifluoromethoxy-benzyl) homopantothenamide (37c)**

$\delta_{\text{H}}$  (300 MHz;  $\text{CDCl}_3$ ; 25°C)  $\delta$  0.92 (3H, s), 1.03 (3H, s), 1.83–1.93 (2H, m), 2.29 (2H, t,  $J$  6.7), 3.34 (1H, t,  $J$  6.1), 3.37 (1H, t,  $J$  6.1), 3.49 (H, d,  $J$  11.2), 3.53 (H, d,  $J$  11.2), 4.02 (1H, s), 4.44 (2H, dd,  $J$  5.9), 6.62 (1H, br s), 7.07 (1H, br s) and 7.19–7.31 (4H, m).

***N*-(4-Trifluoromethyl-benzyl)  $\alpha$ -pantothenamide (38a)**

$\delta_{\text{H}}$  (300 MHz;  $\text{CDCl}_3$ ; 25°C)  $\delta$  0.93 (3H, s), 1.00 (3H, s), 3.46 (1H, d,  $J$  11.2), 3.51 (1H, d,  $J$  11.2), 3.96 (2H, dd,  $J$  5.4, 16.4), 4.02 (2H, dd,  $J$  5.4, 16.4), 4.04 (1H, s), 4.43 (1H, dd,  $J$  5.9, 16.0), 4.48 (1H, dd,  $J$  5.9, 16.0), 6.95 (1H, br s), 7.36 (2H, d,  $J$  7.9), 7.47 (1H, br s) and 7.56 (2H, d,  $J$  8.2).

***N*-(4-Trifluoromethyl-benzyl) pantothenamide (38b)**

$\delta_{\text{H}}$  (400 MHz;  $\text{CDCl}_3$ ; 25°C)  $\delta$  0.89 (3H, s), 0.98 (3H, s), 2.50 (2H, t,  $J$  5.6), 3.46 (2H, s), 3.55–3.63 (2H, m), 3.96 (1H, s), 4.47 (2H, d,  $J$  5.8), 6.54 (1H, br s), 7.35 (1H, br s), 7.38 (2H, d,  $J$  8.3) and 7.58 (2H, d,  $J$  8.3).

***N*-(4-Trifluoromethyl-benzyl) homopantothenamide (38c)**

$\delta_{\text{H}}$  (300 MHz;  $\text{CDCl}_3$ ; 25°C)  $\delta$  0.92 (3H, s), 1.01 (3H, s), 1.84–1.93 (2H, m), 2.30 (2H, t,  $J$  6.7), 3.34 (1H, t,  $J$  6.5), 3.36 (1H, t,  $J$  6.3), 3.48 (1H, d,  $J$  11.2), 3.52 (1H, d,  $J$  11.2), 4.02 (1H, s), 4.49 (2H, d,  $J$  5.9), 6.88 (1H, br s), 7.10 (1H, br s) and 7.41–7.55 (4H, m).

***N*-(3-Trifluoromethyl-benzyl)  $\alpha$ -pantothenamide (39a)**

$\delta_{\text{H}}$  (300 MHz;  $\text{CDCl}_3$ ; 25°C)  $\delta$  0.92 (3H, s), 1.00 (3H, s), 3.46 (1H, d,  $J$  11.2), 3.51 (1H, d,  $J$  11.2), 3.96 (2H,

dd, *J* 5.4, 16.4), 4.02 (2H, dd, *J* 5.4, 16.4), 4.04 (1H, s), 4.46 (2H, d, *J* 5.8), 6.94 (1H, br s) and 7.43–7.54 (5H, m).

***N*-(3-Trifluoromethyl-benzyl) pantothenamide (39b)**

$\delta_{\text{H}}$  (400 MHz; CDCl<sub>3</sub>; 25°C)  $\delta$  0.88 (3H, s), 0.98 (3H, s), 2.50 (2H, t, *J* 5.9), 3.46 (2H, s), 3.54–3.63 (2H, m), 3.97 (1H, s), 4.47 (2H, d, *J* 5.9), 6.54 (1H, br s), 7.35 (1H, br s), 7.44–7.47 (2H, m), 7.51 (1H, s) and 7.53 (1H, d, *J* 6.8).

***N*-(3-Trifluoromethyl-benzyl) homopantothenamide (39c)**

$\delta_{\text{H}}$  (300 MHz; CDCl<sub>3</sub>; 25°C)  $\delta$  0.92 (3H, s), 1.01 (3H, s), 1.84–1.93 (2H, m), 2.30 (2H, t, *J* 6.7), 3.34 (1H, t, *J* 6.2), 3.36 (1H, t, *J* 6.2), 3.47 (1H, d, *J* 11.2), 3.52 (1H, d, *J* 11.2), 4.02 (1H, s), 4.49 (2H, d, *J* 5.9), 6.88 (1H, br s), 7.10 (1H, br s) and 7.41–7.54 (4H, m).

***N*-Dansylcadaverinyl  $\alpha$ -pantothenamide (40a)**

$\delta_{\text{H}}$  (300 MHz; CDCl<sub>3</sub>; 25°C)  $\delta$  0.97 (3H, s), 1.03 (3H, s), 1.23–1.44 (6H, m), 2.82–2.88 (2H, m), 2.88 (6H, s), 3.10–3.24 (2H, m), 3.52 (2H, s), 3.94 (1H, dd, *J* 5.9, 16.4), 4.03 (1H, dd, *J* 5.9, 16.4), 4.09 (1H, s), 5.59 (1H, br s), 6.63 (1H, br s), 7.17 (1H, dd, *J* 7.6), 7.48–7.57 (2H, m), 7.62 (1H, br s), 8.20 (1H, d, *J* 7.3), 8.30 (1H, d, *J* 8.5) and 8.53 (1H, d, *J* 8.5).

***N*-Dansylcadaverinyl pantothenamide (40b)**

$\delta_{\text{H}}$  (400 MHz; CDCl<sub>3</sub>; 25°C)  $\delta$  0.93 (3H, s), 1.00 (3H, s), 1.25–1.46 (6H, m), 2.46 (2H, t, *J* 6.1), 2.87 (2H, m), 2.88 (6H, s), 3.01–3.21 (2H, m), 3.49 (2H, s), 3.56–3.62 (2H, m), 4.02 (1H, s), 5.57 (1H, br s), 6.26 (1H, br s), 7.18 (1H, d, *J* 7.7), 7.47 (1H, br s), 7.49–7.57 (2H, m), 8.21 (1H, d, *J* 7.3), 8.31 (1H, d, *J* 8.5) and 8.53 (1H, d, *J* 8.5).

***N*-Dansylcadaverinyl homopantothenamide (40c)**

$\delta_{\text{H}}$  (300 MHz; CDCl<sub>3</sub>; 25°C)  $\delta$  0.93 (3H, s), 1.00 (3H, s), 1.30–1.43 (6H, m), 1.83–1.92 (2H, m), 2.24 (2H, t, *J* 6.6), 2.68 (2H, t, *J* 6.6), 2.88 (6H, s), 3.10–3.19 (2H, m), 3.35 (1H, t, *J* 6.4), 3.37 (1H, t, *J* 6.4), 3.50 (2H, s), 4.06 (1H, s), 5.58 (1H, br s), 6.46 (1H, br s), 7.17 (1H, m), 7.24 (1H, br s), 7.48–7.56 (2H, m), 8.20 (1H, d, *J* 7.3), 8.30 (1H, d, *J* 8.5) and 8.52 (1H, d, *J* 8.5).

***N*-(1-Morpholin-4-yl)  $\alpha$ -pantothenamide (41a)**

$\delta_{\text{H}}$  (300 MHz; CDCl<sub>3</sub>; 25°C)  $\delta$  0.97 (3H, s), 1.06 (3H, s), 3.44 (2H, t, *J* 4.8), 3.53 (2H, s), 3.61–3.68 (2H, m), 3.68–3.74 (4H, m), 4.08 (1H, s), 4.12 (2H, d, *J* 5.0) and 7.54 (1H, br s).

***N*-(1-Morpholin-4-yl) pantothenamide (41b)**

$\delta_{\text{H}}$  (400 MHz; CDCl<sub>3</sub>; 25°C)  $\delta$  0.92 (3H, s), 1.01 (3H, s), 2.55 (2H, t, *J* 5.8), 3.52–3.42 (4H, m), 3.58–3.68 (8H, m), 3.98 (1H, s) and 7.35 (1H, br s).

***N*-(1-Morpholin-4-yl) homopantothenamide (41c)**

$\delta_{\text{H}}$  (300 MHz; CDCl<sub>3</sub>; 25°C)  $\delta$  0.92 (3H, s), 1.02 (3H, s), 1.85–1.94 (2H, m), 2.39 (2H, t, *J* 6.9), 3.34 (1H, t, *J* 6.0), 3.36 (1H, t, *J* 6.4), 3.45 (2H, t, *J* 4.8), 3.49 (1H, d, *J* 11.2), 3.51 (1H, d, *J* 11.2), 3.57–3.62 (2H, m), 3.62–3.69 (4H, m), 4.00 (1H, s) and 7.14 (1H, br s).

***N*-(1-Thiomorpholin-4-yl)  $\alpha$ -pantothenamide (42a)**

$\delta_{\text{H}}$  (300 MHz; CDCl<sub>3</sub>; 25°C)  $\delta$  0.97 (3H, s), 1.06 (3H, s), 2.61–2.68 (4H, m), 3.53 (2H, s), 3.68–3.73 (2H, m), 3.88–3.98 (2H, m), 4.08 (1H, s), 4.11 (2H, d, *J* 4.7) and 7.55 (1H, br s).

***N*-(1-Thiomorpholin-4-yl) pantothenamide (42b)**

$\delta_{\text{H}}$  (400 MHz; CDCl<sub>3</sub>; 25°C)  $\delta$  0.92 (3H, s), 1.02 (3H, s), 2.55 (2H, t, *J* 5.7), 2.59–2.63 (4H, m), 3.49 (1H, d, *J* 11.2), 3.50 (1H, d, *J* 11.2), 3.58–3.63 (2H, m), 3.71–3.75 (2H, m), 3.85–3.93 (2H, m), 3.98 (1H, s) and 7.32 (1H, br s).

***N*-(1-Thiomorpholin-4-yl) homopantothenamide (42c)**

$\delta_{\text{H}}$  (300 MHz; CDCl<sub>3</sub>; 25°C)  $\delta$  0.93 (3H, s), 1.03 (3H, s), 1.85–1.94 (2H, m), 2.39 (2H, t, *J* 6.9), 2.59–2.63 (4H, m), 3.34 (1H, td, *J* 6.7, 1.8), 3.36 (1H, td, *J* 6.4, 1.8), 3.48 (1H, d, *J* 11.4), 3.51 (1H, d, *J* 11.4), 3.71–3.75 (2H, m), 3.85–3.93 (2H, m), 4.00 (1H, s) and 7.11 (1H, br s).



***N*-(1-Pyrrolidin-1-yl-ethyl)  $\alpha$ -pantothenamide (43a)**

$\delta_{\text{H}}$  (300 MHz; CDCl<sub>3</sub>; 25°C)  $\delta$  1.11 (3H, s), 1.16 (3H, s), 1.80–1.86 (4H, m), 2.53–2.61 (4H, m), 2.65 (2H, t, *J* 7.3), 3.46 (1H, d, *J* 9.9), 3.52 (1H, d, *J* 9.9), 3.82–3.91 (5H, m), 7.33 (1H, br s) and 7.43 (1H, br s).

***N*-(1-Pyrrolidin-1-yl-ethyl) pantothenamide (43b)**

$\delta_{\text{H}}$  (400 MHz; CDCl<sub>3</sub>; 25°C)  $\delta$  0.92 (3H, s), 1.04 (3H, s), 1.82–1.84 (4H, m), 2.40–2.49 (2H, m), 2.56–2.71 (6H, m), 3.27–3.35 (2H, m), 3.42–3.57 (4H, m), 3.60–3.68 (2H, m), 3.93 (1H, s), 6.39 (1H, br s) and 7.39 (1H, br s).

***N*-(1-Pyrrolidin-1-yl-ethyl) homopantothenamide (43c)**

$\delta_{\text{H}}$  (300 MHz; CDCl<sub>3</sub>; 25°C)  $\delta$  0.92 (3H, s), 1.03 (3H, s), 1.77–1.85 (4H, m), 1.83–1.93 (2H, m), 2.26 (2H, td, *J* 6.6, 2.6), 2.56–2.66 (6H, m), 3.26–3.45 (4H, m), 3.49 (1H, d, *J* 11.2), 3.50 (1H, d, *J* 11.2), 3.97 (1H, s), 6.62 (1H, br s) and 7.18 (1H, br s).

***N*-(2-Morpholin-4-yl-ethyl)  $\alpha$ -pantothenamide (44a)**

$\delta_{\text{H}}$  (300 MHz; CDCl<sub>3</sub>; 25°C)  $\delta$  1.06 (3H, s), 1.14 (3H, s), 2.43–2.49 (4H, m), 2.51 (2H, t, *J* 5.9), 3.33–3.45 (2H, m), 3.52 (1H, d, *J* 10.6), 3.58 (1H, d, *J* 10.6), 3.72 (4H, t, *J* 4.7), 3.80 (1H, dd, *J* 5.3, 16.8), 3.95 (1H, s), 4.20 (1H, dd, *J* 7.0, 16.8), 7.09 (1H, br s) and 7.29 (1H, br s).

***N*-(2-Morpholin-4-yl-ethyl) pantothenamide (44b)**

$\delta_{\text{H}}$  (400 MHz; CDCl<sub>3</sub>; 25°C)  $\delta$  0.92 (3H, s), 1.02 (3H, s), 2.43–2.49 (8H, m), 3.28–3.43 (2H, m), 3.48 (2H, s), 3.57 (1H, t, *J* 6.3), 3.59 (1H, t, *J* 6.0), 3.71 (4H, t, *J* 4.6), 3.98 (1H, s), 6.24 (1H, br s) and 7.38 (1H, br s).

***N*-(2-Morpholin-4-yl-ethyl) homopantothenamide (44c)**

$\delta_{\text{H}}$  (300 MHz; CDCl<sub>3</sub>; 25°C)  $\delta$  0.93 (3H, s), 1.02 (3H, s), 1.83–1.92 (2H, m), 2.26 (2H, t, *J* 6.9), 2.45–2.51 (6H, m), 3.34 (1H, t, *J* 5.0), 3.37 (1H, t, *J* 6.0), 3.48 (1H, d, *J* 11.2), 3.51 (1H, d, *J* 11.2), 3.71 (4H, t, *J* 4.7), 4.00 (1H, s), 6.46 (1H, br s) and 7.14 (1H, br s).

***N*-(2-Dimethylamino-ethyl)  $\alpha$ -pantothenamide (46a)**

$\delta_{\text{H}}$  (300 MHz; CDCl<sub>3</sub>; 25°C)  $\delta$  1.13 (3H, s), 1.16 (3H, s), 2.25 (6H, s), 2.47 (2H, t, *J* 5.6), 3.31–3.45 (2H, m), 3.48 (1H, d, *J* 10.0), 3.58 (1H, d, *J* 10.0), 3.69 (1H, dd, *J* 5.0, 17.1), 3.88 (1H, s), 4.34 (1H, dd, *J* 7.9, 17.1), 7.17 (1H, br s) and 7.40 (1H, br s).

***N*-(2-Dimethylamino-ethyl) pantothenamide (46b)**

$\delta_{\text{H}}$  (400 MHz; CDCl<sub>3</sub>; 25°C)  $\delta$  0.92 (3H, s), 1.04 (3H, s), 2.25 (6H, br s), 2.38–2.51 (4H, m), 3.24–3.31 (1H, m), 3.42–3.50 (3H, m), 3.51–3.65 (2H, m), 3.94 (1H, s), 6.26 (1H, br s) and 7.39 (1H, br s).

***N*-(2-Dimethylamino-ethyl) homopantothenamide (46c)**

$\delta_{\text{H}}$  (300 MHz; CDCl<sub>3</sub>; 25°C)  $\delta$  0.92 (3H, s), 1.03 (3H, s), 1.83–1.92 (2H, m), 2.21–2.28 (2H, m), 2.26 (6H, s), 2.45 (2H, t, *J* 5.7), 3.23–3.45 (4H, m), 3.46 (1H, d, *J* 11.4), 3.49 (1H, d, *J* 11.4), 3.97 (1H, s), 6.45 (1H, br s) and 7.19 (1H, br s).

***N*-(2-Diethylamino-ethyl)  $\alpha$ -pantothenamide (47a)**

$\delta_{\text{H}}$  (300 MHz; D<sub>2</sub>O; 25°C)  $\delta$  0.95 (3H, s), 0.96 (3H, s), 1.05 (6H, t, *J* 7.2), 2.62 (4H, q, *J* 7.2), 2.67 (2H, t, *J* 6.9), 3.37 (2H, t, *J* 7.0), 3.46 (1H, d, *J* 11.2), 3.52 (1H, d, *J* 11.2), 3.93 (2H, s) and 4.05 (1H, s).

***N*-(2-Diethylamino-ethyl) pantothenamide (47b)**

$\delta_{\text{H}}$  (400 MHz; D<sub>2</sub>O; 25°C)  $\delta$  0.89 (3H, s), 0.93 (3H, s), 1.05 (6H, t, *J* 7.3), 2.50 (2H, t, *J* 6.4), 2.62 (4H, q, *J* 7.3), 2.66 (2H, t, *J* 7.3), 3.33 (1H, t, *J* 6.6), 3.33 (1H, t, *J* 6.3), 3.40 (1H, d, *J* 11.2), 3.52 (1H, d, *J* 11.2), 3.45–3.58 (2H, m) and 3.99 (1H, s).

***N*-(2-Diethylamino-ethyl) homopantothenamide (47c)**

$\delta_{\text{H}}$  (300 MHz; D<sub>2</sub>O; 25°C)  $\delta$  0.91 (3H, s), 0.95 (3H, s), 1.05 (6H, t, *J* 7.2), 1.77–1.87 (2H, m), 2.29 (2H, t, *J* 7.6), 2.62 (4H, q, *J* 7.3), 2.65 (2H, t, *J* 7.0), 3.26 (2H, t, *J* 6.9), 3.34 (2H, t, *J* 7.0), 3.40 (1H, d, *J* 11.2), 3.53 (1H, d, *J* 11.4) and 4.00 (1H, s).

***N*-(2-(4-Ethyl-piperazin-1-yl)-ethyl)  $\alpha$ -pantothenamide (48a)**

$\delta_{\text{H}}$  (300 MHz; CDCl<sub>3</sub>; 25°C)  $\delta$  0.97 (3H, s), 1.06 (3H, s), 1.10 (3H, t, *J* 7.2), 2.41–2.49 (6H, m), 3.45 (2H, dd, *J* 5.1, 5.3), 3.50 (1H, d, *J* 11.9), 3.54 (1H, d, *J* 11.9), 3.66 (2H, dd, *J* 5.1, 5.3), 4.07 (1H, s), 4.12 (2H, d, *J* 4.7) and 7.53 (1H, br s).

***N*-(2-(4-Ethyl-piperazin-1-yl)-ethyl) pantothenamide (48b)**

$\delta_{\text{H}}$  (400 MHz; CDCl<sub>3</sub>; 25°C)  $\delta$  0.91 (3H, s), 1.01 (3H, s), 1.09 (3H, t, *J* 7.3), 2.38–2.45 (6H, m), 2.55 (2H, t, *J* 5.7), 3.44–3.68 (4H, m), 3.56–3.68 (4H, m), 3.98 (1H, s) and 7.37 (1H, br).

***N*-(2-(4-Ethyl-piperazin-1-yl)-ethyl) homopantothenamide (48c)**

$\delta_{\text{H}}$  (300 MHz; CDCl<sub>3</sub>; 25°C)  $\delta$  0.92 (3H, s), 1.02 (3H, s), 1.09 (3H, t, *J* 7.2), 1.84–1.93 (2H, m), 2.38–2.46 (8H, m), 3.33 (1H, t, *J* 6.6), 3.36 (1H, t, *J* 6.5), 3.44–3.50 (4H, m), 3.62 (1H, d, *J* 5.1), 3.63 (1H, d, *J* 5.1) and 3.99 (1H, s).

***N*-(2-(4-Hydroxymethyl-piperazin-1-yl)-ethyl)  $\alpha$ -pantothenamide (49a)**

$\delta_{\text{H}}$  (300 MHz; D<sub>2</sub>O; 25°C)  $\delta$  0.95 (3H, s), 0.96 (3H, s), 2.58–2.67 (6H, m), 3.44 (1H, d, *J* 11.2), 3.53 (1H, d, *J* 11.2), 3.57–3.62 (4H, m), 3.76 (2H, t, *J* 6.2), 4.08 (1H, s) and 4.19 (2H, s).

***N*-(2-(4-Hydroxymethyl-piperazin-1-yl)-ethyl) pantothenamide (49b)**

$\delta_{\text{H}}$  (400 MHz; D<sub>2</sub>O; 25°C)  $\delta$  0.89 (3H, s), 0.93 (3H, s), 2.52–2.64 (6H, m), 2.71 (2H, t, *J* 6.6), 2.90 (2H, t, *J* 4.9), 3.40 (1H, d, *J* 11.0), 3.51–3.53 (3H, m), 3.60 (2H, m), 3.74 (1H, t, *J* 5.9), 3.75 (1H, t, *J* 6.2) and 3.99 (1H, s).

***N*-(2-(4-Hydroxymethyl-piperazin-1-yl)-ethyl) homopantothenamide (49c)**

$\delta_{\text{H}}$  (300 MHz; D<sub>2</sub>O; 25°C)  $\delta$  0.92 (3H, s), 0.95 (3H, s), 1.77–1.87 (2H, m), 2.49 (2H, t, *J* 7.6), 2.55–2.63 (6H, m), 3.26–3.33 (2H, m), 3.41 (1H, d, *J* 11.2), 3.53 (1H, d, *J* 11.2), 3.60 (4H, t, *J* 4.5), 3.76 (2H, t, *J* 6.2) and 4.00 (1H, s).

***Inhibitory effects of N-substituted pantothenamides***

Inhibition assays were performed by preparing a starter culture of *Escherichia coli* K12 in 1% tryptone containing four separate colonies grown on LB agar plates. The starter culture was grown to mid-log phase and then diluted 30 000-fold in the same medium. A 10  $\mu$ l aliquot of the diluted cell suspension was used to inoculate each well of a 96-well flat-bottomed plate containing 100  $\mu$ l of 1% tryptone broth supplemented with a specific *N*-substituted pantothenamide (final concentration 50  $\mu$ M). The plates were incubated at 37°C for 20 hours before the cell densities were measured by reading the absorbance in each well at 600 nm. The extent of growth in each well was determined by normalizing the OD<sub>600</sub> values relative to those of the negative control (containing 3% acetonitrile instead of pantothenamide), which were taken as 100% growth. Each compound was tested in quadruplicate and the average % growth and standard deviations were determined from these experiments. The results are reported in Table 1.

This journal is (c) The Royal Society of Chemistry 2008

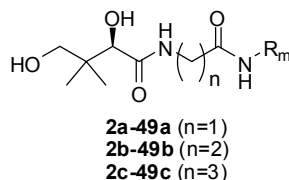

| Entry | R-group              | Average growth (%) |               |          | Entry | R-group | Average growth (%) |          |          |
|-------|----------------------|--------------------|---------------|----------|-------|---------|--------------------|----------|----------|
|       |                      | a (n=1)            | b (n=2)       | c (n=3)  |       |         | a (n=1)            | b (n=2)  | c (n=3)  |
| 2     |                      | 134 ± 16           | 94 ± 8        | 157 ± 22 | 26    |         | 107 ± 23           | 96 ± 18  | 106 ± 5  |
| 3     |                      | 134 ± 20           | 56 ± 11       | 135 ± 25 | 27    |         | 118 ± 26           | 62 ± 18  | 105 ± 5  |
| 4     |                      | 104 ± 11           | <b>-2 ± 2</b> | 129 ± 23 | 28    |         | 114 ± 18           | 71 ± 29  | 110 ± 7  |
| 5     |                      | 114 ± 8            | 75 ± 14       | 183 ± 10 | 29    |         | 85 ± 15            | 72 ± 18  | 96 ± 4   |
| 6     |                      | 76 ± 13            | 122 ± 45      | 151 ± 27 | 30    |         | 101 ± 9            | 87 ± 28  | 92 ± 9   |
| 7     |                      | 112 ± 27           | 125 ± 16      | 143 ± 2  | 31    |         | 97 ± 14            | 75 ± 23  | 101 ± 17 |
| -     | No inhibitor/Control | 100 ± 11           | 100 ± 9       | 100 ± 8  | 32    |         | 153 ± 49           | 62 ± 17  | 106 ± 15 |
| 9     |                      | 112 ± 31           | 110 ± 6       | 176 ± 15 | 33    |         | 123 ± 15           | 115 ± 23 | 104 ± 14 |
| 10    |                      | 94 ± 15            | 107 ± 21      | 115 ± 18 | 34    |         | 85 ± 4             | 108 ± 28 | 139 ± 18 |
| 11    |                      | 57 ± 13            | 94 ± 15       | 152 ± 27 | 35    |         | 83 ± 4             | 99 ± 16  | 96 ± 25  |
| 12    |                      | 75 ± 11            | 94 ± 27       | 125 ± 17 | 36    |         | 68 ± 12            | 116 ± 25 | 94 ± 10  |
| 13    |                      | 76 ± 4             | 79 ± 14       | 136 ± 26 | 37    |         | 66 ± 18            | 83 ± 25  | 85 ± 22  |
| 14    |                      | <b>-2 ± 5</b>      | 40 ± 8        | 130 ± 29 | 38    |         | 73 ± 16            | 85 ± 4   | 110 ± 10 |
| 15    |                      | 89 ± 10            | 83 ± 11       | 126 ± 21 | 39    |         | 90 ± 10            | 92 ± 30  | 88 ± 8   |
| 16    |                      | <b>-3 ± 1</b>      | 69 ± 13       | 126 ± 29 | 40    |         | 86 ± 24            | 75 ± 25  | 107 ± 31 |
| 17    |                      | 112 ± 41           | 155 ± 19      | 158 ± 19 | 41    |         | 99 ± 13            | 98 ± 25  | 109 ± 29 |
| 18    |                      | 124 ± 14           | 101 ± 11      | 150 ± 27 | 42    |         | 60 ± 8             | 98 ± 18  | 100 ± 15 |
| 19    |                      | 106 ± 30           | 84 ± 32       | 129 ± 18 | 43    |         | 66 ± 4             | 100 ± 14 | 82 ± 8   |
| 20    |                      | 87 ± 12            | 60 ± 28       | 120 ± 22 | 44    |         | 77 ± 17            | 95 ± 14  | 66 ± 9   |
| 21    |                      | 82 ± 31            | 95 ± 17       | 103 ± 26 | 45    |         | 71 ± 4             | 110 ± 16 | 84 ± 7   |
| 22    |                      | 90 ± 25            | 118 ± 41      | 83 ± 23  | 46    |         | 82 ± 19            | 91 ± 14  | 75 ± 7   |
| 23    |                      | 121 ± 26           | 88 ± 32       | 94 ± 20  | 47    |         | 84 ± 6             | 105 ± 10 | 77 ± 18  |
| 24    |                      | 108 ± 8            | 70 ± 16       | 97 ± 21  | 48    |         | 81 ± 25            | 95 ± 15  | 86 ± 8   |
| 25    |                      | 149 ± 43           | 131 ± 17      | 114 ± 12 | 49    |         | 110 ± 19           | 109 ± 22 | 119 ± 9  |

### References:

1. S. Yamada, Y. Yokoyama and T. Shioiri, *J. Org. Chem.*, 1974, **39**, 3302.
2. J. W. Lee, S. I. Jun and K. Kim, *Tetrahedron Lett.*, 2001, **42**, 2709.
